# Supplementary material for: Oral bisphosphonates may not decrease hip fracture risk in elderly Spanish women: a nested case–control study
Source: PubMed Central journal article supplement — BMJ Open. 2013 Feb 20;3(2):e002084. doi: 10.1136/bmjopen-2012-002084 (PMC3586051; doi:10.1136/bmjopen-2012-002084), 2013-02-20
Supplement: bmjopen-2012-002084.draft_revisions.pdf [file bmjopen-2012-002084.draft_revisions.pdf]

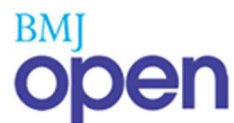

**ORAL BISPHOSPHONATES MAY NOT DECREASE HIP FRACTURE RISK IN ELDERLY SPANISH WOMEN**

|                                 |                                                                                                                                                                                                                                                                                                                |
|---------------------------------|----------------------------------------------------------------------------------------------------------------------------------------------------------------------------------------------------------------------------------------------------------------------------------------------------------------|
| Journal:                        | <i>BMJ Open</i>                                                                                                                                                                                                                                                                                                |
| Manuscript ID:                  | bmjopen-2012-002084                                                                                                                                                                                                                                                                                            |
| Article Type:                   | Research                                                                                                                                                                                                                                                                                                       |
| Date Submitted by the Author:   | 10-Sep-2012                                                                                                                                                                                                                                                                                                    |
| Complete List of Authors:       | Erviti, Juan; Navarre Health Service, Drug Information Unit<br>Alonso, Alvaro; University of Minnesota, School of Public Health; University of Navarre, School of Medicine<br>Gorricho, Javier; Navarre Health Service, Drug Information Unit<br>López, Antonio; Navarre Health Service, Drug Information Unit |
| <b>Primary Subject Heading</b>: | Pharmacology and therapeutics                                                                                                                                                                                                                                                                                  |
| Secondary Subject Heading:      | Epidemiology                                                                                                                                                                                                                                                                                                   |
| Keywords:                       | CLINICAL PHARMACOLOGY, EPIDEMIOLOGY, PRIMARY CARE                                                                                                                                                                                                                                                              |
|                                 |                                                                                                                                                                                                                                                                                                                |

SCHOLARONE™  
Manuscripts

Peer Review Only

**TITLE****ORAL BISPHOSPHONATES MAY NOT DECREASE HIP FRACTURE RISK  
IN ELDERLY SPANISH WOMEN****AUTHORS**

Juan Erviti, Álvaro Alonso<sup>1,2</sup>, Javier Gorricho, Antonio López

Drug Prescribing Service, Navarre Regional Health Service, Pamplona, Navarre, Spain;

<sup>1</sup>School of Public Health, University of Minnesota, Minneapolis, Minnesota, United States;

<sup>2</sup>School of Medicine, University of Navarre, Pamplona, Navarre, Spain.

**ARTICLE SUMMARY****Article Focus**

. The hypothesis of this study is that oral bisphosphonates may not be effective in reducing hip fracture risk in clinical practice in the long-term use.

**Key messages**

. Ever use of oral bisphosphonates was not associated with a decreased risk of hip fracture in women aged 65 or older as compared to never use.

. No association between hip fracture risk and cumulative duration of bisphosphonate treatment was observed.

. When treatment duration is analysed as time since first prescription, a statistically significant increased risk for hip fracture was observed in patients exposed to bisphosphonates over 3 years.

**Strengths and limitations**

. The main strength of this study is that it sheds light on the effects of oral bisphosphonates on hip fracture risk in clinical practice in a Mediterranean population.

. One of the main limitations is the relatively short follow-up period.

**ABSTRACT**

## Objectives

To evaluate the association between long-term use of bisphosphonates and the risk of hip fracture compared to never use among women aged 65 years or older.

## Design

Case-control study nested in a cohort.

## Setting

General practice research database operated by the Spanish Medicines Agency.

## Participants:

Cases of hip fracture were defined as women aged 65 years or older with a validated first diagnosis of hip fracture between 2005 and 2008. Five controls free of hip fracture were matched on age and calendar year with each case.

## Interventions

Information on bisphosphonate use, hip fractures, comedication, and comorbidities was collected.

## Primary outcomes

Hip fracture risk comparing bisphosphonate users vs never users

## Secondary outcomes

Hip fracture risk comparing bisphosphonate users vs never users by individual drugs

## Results

The study included 2,009 incident hip fractures and 10,045 matched controls. Hip fracture risk did not differ between bisphosphonate users and never users, adjusted OR = 1.09 (95% CI, 0.94-1.27). No association between hip fracture risk and cumulative duration of bisphosphonate treatment was observed. However, when treatment duration is analysed as time since first prescription, hip fracture risk of the different subgroups compared to never users obtained were as follows: <1 year, OR 0.85 (95%CI, 0.60-1.21); 1 to <3 years, OR 1.02 (95%CI 0.82-1.26); ≥ 3 years, OR 1.32 (95%CI 1.05-1.65) (p for trend = 0.03).

## Conclusions

1  
2  
3 Ever use of oral bisphosphonates was not associated with a decreased risk  
4 of hip fracture in women aged 65 or older as compared to never use. No  
5 association between hip fracture risk and cumulative duration of  
6 bisphosphonate treatment was observed. However, when treatment  
7 duration is analysed as time since first prescription, a statistically significant  
8 increased risk for hip fracture was observed in patients exposed to  
9 bisphosphonates over 3 years.  
10  
11

## 12 **Trial Registration**

13  
14 Spanish Ministry of Health. TRA-071  
15  
16  
17

## 18 **INTRODUCTION**

### 19 **Background**

20  
21  
22  
23  
24  
25 When bisphosphonates came onto the market, they had demonstrated  
26 efficacy in the improvement of bone density, but there was no evidence for  
27 reduction of hip fractures. They were introduced on the theoretical  
28 assumption that the increase in bone density implied strengthening of the  
29 bone structure, and therefore a reduction in the risk of fracture.  
30

31  
32 In most pivotal trials comparing the effects of alendronate,<sup>1-4</sup> risedronate,<sup>5-7</sup>  
33 or ibandronate<sup>8</sup> versus placebo hip fractures were considered as secondary  
34 endpoints and outcomes did not show any clear potential benefit in  
35 decreasing hip fracture risk. Several meta-analyses of alendronate and  
36 risedronate have been carried out and a statistically significant benefit of  
37 these drugs over placebo is claimed. However, the clinical significance of the  
38 findings is debateable and methodology biases are also present in the  
39 reviews.<sup>9</sup> A recent meta-analysis obtained similar results. However, trials'  
40 quality assessment was carried out and revealed an unclear or high risk of  
41 bias in approximately 75% of the trials. This means that the small  
42 significant reduction in hip fracture may not be real, or at best, is an  
43 exaggeration of the real benefit.<sup>10</sup>  
44  
45  
46

47  
48 In 2006 the longest ever clinical trial evaluating the effects of  
49 bisphosphonates was published. After 5 years under alendronate, women  
50 were randomized to either continue taking the drug or receive placebo for  
51 another five years. Discontinuation of alendronate for up to five years did  
52 not increase fracture risk.<sup>11</sup> However no comparison between alendronate  
53 use versus no use was established. This prompted us to carry out the  
54 present study.<sup>12</sup>  
55  
56

57  
58 The long-term use of bisphosphonates has been associated with deleterious  
59 effects on bone structure such as osteonecrosis of the jaw, atypical  
60

1  
2  
3 fractures and bone pain that prompted several safety communications  
4 issued by both the FDA and EMA.<sup>13,14</sup>  
5

6 In 2008 a cohort study in Danish women with no previous hip fracture was  
7 published. The incidence of hip fractures increased in the group treated with  
8 alendronate by 50% in relative terms and by 6 cases per 1,000 women-  
9 years in absolute terms<sup>15</sup>. Updated information from this Danish cohort was  
10 published in 2010 and the increased incidence of hip fractures in women  
11 taking alendronate was confirmed.<sup>16</sup>  
12  
13

## 14 15 16 **Objective**

17 The aim of this study is to evaluate the association between long-term use  
18 of bisphosphonates and the risk of hip fracture compared to never use  
19 among women aged 65 years or older.  
20  
21  
22  
23

## 24 25 **METHODS**

### 26 27 **Study design and setting**

28 We carried out a case-control study nested in a cohort in Spain using the  
29 information from BIFAP (*Base de Datos para la Investigación*  
30 *Farmacoepidemiológica en Atención Primaria*, Database for  
31 *Pharmacoepidemiologic Research in Primary Care*). This is a longitudinal  
32 population-based database kept by the Spanish Agency for Medicines and  
33 Medical Devices that collates, from 2001 onwards, the computerized  
34 medical records of more than 1,800 physicians throughout Spain. It includes  
35 anonymized information on over 3.2 million patients, totalling over 13.7  
36 million person-years of follow up.<sup>17,18</sup>  
37  
38  
39  
40

41 This project was approved by the Navarre Research Ethics Board,  
42 Pamplona, Spain. All data were anonymized and no written consent was  
43 necessary for this type of study according to the Spanish regulations (law  
44 41/2002, article 16).  
45  
46  
47  
48

### 49 50 **Participants**

51 Cases were defined as women aged 65 years or older with a first diagnosis  
52 of hip fracture, using the ICPC-1 codes, recorded between 01/01/2005 and  
53 31/12/2008, and with at least 1 year of follow-up in BIFAP before the event  
54 date. The date of hospitalization served as the index date. All hip fracture  
55 cases were double-checked and validated by both BIFAP and the research  
56 team. We excluded women with any history of cancer, Paget disease,  
57  
58  
59  
60

1  
2  
3 prevalent hip fracture and fractures resulting from trauma or motor vehicle  
4 collisions. For each case, 5 controls with no history of hip fracture by the  
5 time of the index date of their corresponding case were selected, matched  
6 by same age and calendar year of enrolment in BIFAP.  
7

### 8 **Medication use and other covariates**

9  
10 Use of bisphosphonates before the index date was obtained from the  
11 computerized database. Duration of bisphosphonate exposure was  
12 evaluated by examining prescriptions for oral alendronate, risedronate,  
13 ibandronate or etidronate from the beginning of therapy to the index date  
14 or the corresponding date among controls (ATC codes: alendronate,  
15 M05BA04; alendronate plus vitamin D, M05BB; risedronate, M05BA07 and  
16 ibandronate, M05BA06).  
17  
18

19  
20 Individuals were classified as ever vs never users. Ever users were also  
21 divided into *current users* (if most recent prescription lasted through index  
22 date or ended in the month before it), *recent users* (if most recent  
23 prescription ended between 1 and 6 months before index date) and *past*  
24 *users* (if most recent prescription ended more than 6 months before index  
25 date).  
26  
27

28  
29 In order to assess the effects of treatment length on the outcomes two  
30 criteria were used: a) Cumulative duration of actual treatment; and b) Time  
31 since first prescription. In both, three different subgroups were considered,  
32 namely <1 year; 1 to 3 years and over 3 years.  
33

34  
35 Information on comorbidities (ICPC-1 codes) and use of other medications  
36 (ATC codes) was obtained. Patients were considered exposed if the most  
37 recent prescription lasted through index date or ended in the month before  
38 it. Other variables such as weight (kg), height (cm), body mass index  
39 (kg/m<sup>2</sup>) and smoking status (yes/no/past smoker) were obtained as well.  
40

### 41 **Statistical methods**

42  
43 Between 2005 and 2008 we expected to find some 2,000 cases and 10,000  
44 controls in our database. This would provide statistical power >90% to  
45 detect a change >20% in the risk of having hip fracture associated to  
46 bisphosphonate use with an alpha risk of 5% and a prevalence of exposure  
47 of 20%.  
48

49  
50 We used conditional logistic regression to estimate the odds ratios (ORs)  
51 and 95 percent confidence intervals (CIs) for the association between  
52 bisphosphonate exposure and hip fractures. Bisphosphonate use was  
53 categorized as ever vs never. In separate analyses, current, recent, or past  
54 use was also evaluated. Treatment duration was assessed as well and  
55 results were tested to identify a trend. The level of significance was  
56 established at p = 0.05. In the duration analysis adjusted for exposure,  
57 never users was considered as the reference group. The results were also  
58  
59  
60

1  
2  
3 compared to bisphosphonate users for less than one year as a sensitivity  
4 analysis in case of selection bias.  
5

6 An initial "model 1" adjusted only for matching variables. A second "model  
7 2" adjusted additionally for smoking, BMI, alcoholism, previous fracture,  
8 kidney disease, malabsorption, stroke, dementia, rheumatoid arthritis,  
9 diabetes, epilepsy, Parkinson disease, thyroid disease, PPI (no use, <=1 yr,  
10 >1 yr), anxiolytics, sedatives, antidepressants, antihypertensives, oral  
11 corticosteroids (no use, <=1 yr, >1 yr), raloxifene, hormone replacement  
12 therapy, and thiazolidinediones.  
13

## 14 15 16 **RESULTS**

### 17 ***Participants***

18  
19 Between 2005 and 2008, 3,181 potentially eligible cases were registered.  
20 Out of them we validated 2,069 hip fractures and 45 atypical fractures (31  
21 subtrochanteric and 14 shaft fractures). Of the remainder 1,067 records  
22 were classified as "no case", 718 "other diagnoses" and 349 "lacking  
23 information". Sixty cases were excluded due to lack of matching controls. A  
24 total of 2,009 cases were obtained and 10,045 matching controls were  
25 selected (figure 1).  
26  
27  
28

29 The average age of cases was  $82.4 \pm 6.6$  years. In general terms co-  
30 morbidities and drug use was more prevalent in cases while smoking status  
31 and BMI were similar between cases and controls (table 1).  
32  
33

### 34 ***Outcome data***

35 Hip fractures were more frequent among bisphosphonate users, 283  
36 (14.1%) compared to never users, 1207 (12.0%). Results according to  
37 timing, duration, and bisphosphonate exposure are described in table 2.  
38  
39

### 40 ***Main results***

41 Ever users of bisphosphonates had a higher risk of hip fracture compared to  
42 never users (unadjusted OR = 1.21, 95%CI, 1.05-1.39). After adjusting for  
43 co-medication and pathologies no significant differences were found  
44 between bisphosphonate users and never users, OR = 1.09 (95%CI, 0.94-  
45 1.27).  
46  
47  
48

49  
50 No association between hip fracture risk and cumulative duration of  
51 bisphosphonate treatment was observed: <1 year, OR 1.20 (95% CI, 0.97-  
52 1.47); 1 to <3 years, OR 0.94 (95% CI, 0.74-1.20);  $\geq 3$  years, OR 1.15  
53 (95%CI, 0.82-1.60) (p for trend = 0.63). However, when treatment  
54 duration is analysed as time since first prescription, hip fracture risk of the  
55 different subgroups compared to never users obtained were as follows: <1  
56  
57  
58  
59  
60

1  
2  
3 year, OR 0.85 (95%CI, 0.60-1.21); 1 to <3 years, OR 1.02 (95%CI 0.82-  
4 1.26); ≥ 3 years, OR 1.32 (95%CI 1.05-1.65) (p for trend = 0.03). If  
5 women exposed to bisphosphonates during less than one year was  
6 considered as the reference group, hip fracture risk observed in the  
7 different subgroups were: 1 to <3 years, OR 1.56 (95%CI 0.73-3.31); ≥ 3  
8 years, OR 2.31 (95%CI 1.00-5.36) (p for trend = 0.03) (tables 2 and 3).

9  
10  
11 No significant trend was observed for timing (past, recent and current use).  
12 Past use of bisphosphonates was associated with a statistically significant  
13 increase in hip fracture risk (OR = 1.50, 95%CI 1.19-1.89) while current or  
14 recent use was not (table 2).

15  
16  
17 No protective effect on hip fracture risk was observed when the results were  
18 analysed by individual drugs. On the contrary, a statistically significant  
19 increased risk was found for ibandronate users (OR = 3.67, 95%CI 1.31-  
20 10.3) and for switchers as well (OR = 1.63, 95%CI 1.07-2.47) (table 4).

## 21 22 23 24 25 **DISCUSSION**

### 26 27 **Key results**

28  
29 According to our findings oral bisphosphonates may not decrease hip  
30 fracture risk in elderly women. In order to reduce selection bias, results  
31 were adjusted for co-pathologies and medication. However, residual  
32 selection bias may still occur. In a cohort study in Danish women with a  
33 previous fracture but with no previous hip fracture, the risk of hip fracture  
34 was increased in the group treated with alendronate.<sup>15,16</sup> This study was  
35 performed on alendronate only whereas in our study all oral  
36 bisphosphonates were included. Our findings are in line with the Danish  
37 study in which a higher hip fracture risk was observed.

38  
39  
40 A recent meta-analysis of clinical trials assessed the effects of  
41 bisphosphonates on hip and wrist fracture risk. Similar results to previous  
42 meta-analyses were observed, namely a 1% absolute reduction of hip  
43 fracture risk in bisphosphonate users. What is new about this publication is  
44 that trials' quality assessment was carried out and revealed an unclear or  
45 high risk of bias in approximately 75% of the trials. This means that the  
46 small significant reduction in hip fracture may not be real, or at best, is an  
47 exaggeration of the real benefit<sup>10</sup>Error! Bookmark not defined. which is in line with  
48 our findings.

49  
50  
51  
52  
53  
54  
55 We evaluated the effects of treatment length and the results by individual  
56 drugs as secondary outcomes. No association between hip fracture risk and  
57 cumulative duration of bisphosphonate treatment was observed. However,  
58  
59  
60



1  
2  
3 fracture risk increased with longer exposure to bisphosphonates. A  
4 statistically significant trend for increased risk of hip fracture was observed  
5 among bisphosphonate users irrespective of whether the reference group  
6 was never users or women under treatment for less than one year. Results  
7 were tested against the two different reference groups because of the  
8 possible selection bias in any of them. The results were consistent in both  
9 analyses.  
10

11  
12 According to the results by individual drugs, no protective effect was  
13 observed. On the contrary, a statistically significant increased risk was  
14 found for ibandronate users and for switchers as well. Probably ibandronate  
15 results in our study are conditioned by a small sample size.  
16

17  
18 No significant trend was observed for timing (past, recent and current use).  
19 Past users showed a statistically significant higher fracture risk when  
20 compared to never users while current or recent users did not. This could be  
21 interpreted as if bisphosphonates provided a protective effect on hip  
22 fracture risk that disappears after drug withdrawal. However there are some  
23 other possible explanations for this. First, treatment withdrawal could be  
24 more frequent in patients suffering from drug adverse reactions, in those  
25 who did not tolerate treatment, or had a poorer clinical status. All these  
26 patients have a higher fracture risk and selection bias is another possible  
27 explanation for a higher fracture risk in patients who stopped taking  
28 bisphosphonates.  
29  
30  
31

32  
33 Second, bisphosphonates accumulate in bone structure and past users are  
34 exposed to the drug effects for many years after withdrawal. Given the  
35 relatively short follow-up period in this study, all patients are exposed to the  
36 drug effects irrespective of whether they are past, recent or current users.  
37 Thereby interpreting results according to these subgroups may be  
38 meaningless. The FLEX trial shows that there is no difference in hip fracture  
39 risk between past and current users. Past users had been under treatment  
40 for 5 years and had stopped taking the drug 5 years before assessment.  
41 This trial supports that alendronate accumulates in bone and past users are  
42 exposed to the drug effects for many years after withdrawal. Thereby it  
43 makes sense to consider exposure to bisphosphonates in the results  
44 analysis. Also we must take into account that in the FLEX trial there is no  
45 selection bias due to randomization, and consequently its findings support  
46 that the higher risk observed in the past users in our study may be related  
47 to a selection bias and a longer exposure to bisphosphonates in this  
48 subgroup as well.  
49  
50  
51  
52

53  
54  
55 A recent article published by FDA researchers analysed the results of three  
56 long-term extension trials on alendronate, risedronate and zoledronic acid.  
57 Pooled data pertaining to patients who received continuous bisphosphonate  
58  
59  
60

1  
2  
3 treatment for 6 or more years resulted in fracture rates ranging from 9.3 to  
4 10.6%, whereas the rate for patients switched to placebo was 8.0 to 8.8%.  
5 These data raise the question on whether long-term use of bisphosphonates  
6 is beneficial for patients.<sup>19</sup>  
7

8  
9 With long-term use it is widely accepted that bisphosphonates may cause  
10 osteonecrosis of the jaw and atypical fractures as well. Recently, a self-  
11 controlled case series analysis showed that bisphosphonate use was  
12 associated with osteonecrosis at any site.<sup>20</sup> Deleterious effects on bone  
13 structure have been observed with bisphosphonates and denosumab as well  
14 but not with other osteoporosis drugs. Both type of drugs inhibit bone  
15 turnover and thereby bone strength may be weaker as a result of  
16 treatment. Besides bisphosphonates prolong secondary mineralization  
17 leading to increased bone density but decreased bone toughness due to a  
18 higher mineral content (brittle bones). Since there is biological rationale to  
19 explain the harmful effects of bisphosphonates on bone, more long-term  
20 studies are needed to test our findings.  
21  
22  
23

### 24 25 26 **Limitations** 27

28 One of the main limitations in our study is the relatively short follow-up  
29 period. Besides, we relied on prescription data to determine duration of  
30 bisphosphonate exposure. It is sensible to think that real exposure will likely  
31 be lower than registered. In the clinical records included in the BIFAP  
32 database, X-ray images are not available which might occasionally lead to  
33 misclassification of cases. However we believe this may not be a relevant  
34 limitation yet hip fracture cases are described in detail in the surgical  
35 procedures.  
36  
37

38  
39 Another aspect to be pointed out is that ibandronate was marketed in Spain  
40 in January 2007 and in our study we included incident cases of hip fracture  
41 that occurred between 2005 and 2008. Thereby the exposure of both cases  
42 and controls to ibandronate is rather short-term.  
43  
44

45 Confounding by indication is a possible bias of this study. Theoretically  
46 women in a poor baseline condition could be prescribed bisphosphonates to  
47 a greater extent when compared to women with a better health status. In  
48 order to minimize this bias, results were adjusted for previous fractures,  
49 comorbidities and use of other medications.  
50  
51

52  
53  
54 Bone mineral density determination is not a standard test available in the  
55 public health system in Spain. Thereby information on BMD in clinical  
56 records was rather scarce. However, this test has a very poor fracture risk  
57 predictive value and its clinical relevance can be challenged. When it comes  
58  
59  
60

1  
2  
3 to adjusting crude data we used other bone-related variables instead such  
4 as prevalence of previous fractures.  
5  
6  
7

### 8 **Conclusions**

9  
10 Ever use of oral bisphosphonates was not associated with a decreased risk  
11 of hip fracture in women aged 65 or older as compared to never use. No  
12 association between hip fracture risk and cumulative duration of  
13 bisphosphonate treatment was observed. However, when treatment  
14 duration is analysed as time since first prescription, a statistically significant  
15 increased risk for hip fracture was observed in patients exposed to  
16 bisphosphonates over 3 years.  
17  
18  
19  
20  
21

### 22 **Acknowledgements**

23  
24 The authors would like to thank the collaboration of general practitioners  
25 contributing to BIFAP.  
26  
27  
28

### 29 **Disclaimer:**

30  
31 The Spanish Agency of Medicines and Medical Devices (AEMPS) provided the  
32 crude data from BIFAP to the researchers according to an agreement with  
33 the Health Department of Navarre Government but did not take part in the  
34 design or in the study development. Authors are fully responsible for the  
35 analysis, results and opinions appearing in the paper and do not represent  
36 the position of the AEMPS. The views expressed are those of the authors  
37 only and do not represent necessarily the position of their respective  
38 institutions.  
39  
40  
41  
42  
43  
44

### 45 **Footnotes**

- 46  
47
- 48 • Contributors JE, AA, JG and AL were responsible for developing of  
49 study concept and design, data validation and interpretation of the  
50 results. AA performed the statistical analyses. JE drafted the  
51 manuscript. All authors have been involved in revising and  
52 elaborating it critically in the intellectual context.
  - 53 • Funding: The present study is funded by the Spanish Ministry of  
54 Health, grant SAS/2481/2009 No TRA-071
  - 55 • Competing interests: None.
  - 56 • Ethics approval: Navarre Research Ethics Board, Pamplona, Spain.
  - 57 • Data sharing statement: There are no additional data sharing to other  
58 parties.  
59  
60

## References

- 1 Black DM, Cummings SR, Karpf DB, et al. Randomised trial of effect of alendronate on risk fracture in women with existing vertebral fractures. *Lancet* 1996;348:1535-41.
- 2 Cummings SR, Black DM, Thompson D, et al. Effect of alendronate on risk of fracture in women with low bone density but without vertebral fractures. Results from the fracture intervention trial. *JAMA* 1998;280:2077-82.
- 3 Liberman UA, Weiss SR, Broll J, et al. Effects of oral alendronate on bone mineral density and the incidence of fractures in postmenopausal osteoporosis. *N Engl J Med* 1995;333:1437-43
- 4 Bone HG, Downs RW, Tucci JR, et al. Dose-response relationships for alendronate treatment in osteoporotic elderly women. *J Clin Endocrinol Metab* 1997;82:265-274.
- 5 Reginster JY, Minne HW, Sorensen OH, et al. Vertebral Efficacy with Risedronate Therapy (VERT) Study Group. Randomized trial of the effects of risedronate on vertebral fractures in women with established postmenopausal osteoporosis. *Osteoporos Int* 2000;11:83-91.
- 6 Harris ST, Watts NB, Genent HK, et al. Effects of risedronate treatment on vertebral and non vertebral fractures in women with postmenopausal osteoporosis: a randomized controlled trial. *JAMA* 1999;282:1344-52.
- 7 McClung MR, Geusens P, Miller PD, et al. Effect of risedronate on the risk of hip fracture in elderly women. *N Engl J Med* 2001;344:333-40.
- 8 Chesnut CH, Skag A, Christiansen C, et al. Effects of oral ibandronate administered daily or intermittently on fracture risk in postmenopausal osteoporosis. *J Bone Miner Res.* 2004;19(8):1241-9.
- 9 Erviti J. Bisphosphonates: do they prevent or cause bone fractures? *Drug & Therapeutics Bulletin of Navarre (Spain)* 2009;17(5):65-75.
- 10 Therapeutics Initiative. A systematic review of the efficacy of bisphosphonates. *Therapeutics Letter* 2011 Sept-Oct 83:1-2.
- 11 Black DM, Schwartz AV, Ensrud KE, et al. Effects of Continuing or Stopping Alendronate After 5 Years of Treatment. The Fracture Intervention Trial Long-term Extension (FLEX): A Randomized Trial *JAMA*. 2006;296:2927-2938.
- 12 Erviti J and Gorricho J. Use of alendronate after 5 years of treatment (letter). *JAMA* 2007;297(18):1979-1981.
- 13 CHMP assessment report on bisphosphonates and osteonecrosis of the jaw. EMEA/CHMP/291125/2009 (last access 02/08/2012)
- 14 FDA Drug Safety Communication: Ongoing safety review of oral bisphosphonates and atypical subtrochanteric femur fractures. Available at <http://www.fda.gov/NewsEvents/Newsroom/PressAnnouncements/2010/ucm229171.htm> (last access 02/08/2012)
- 15 Abrahamsen B, Eiken P, and Eastell R. Subtrochanteric and diaphyseal femur fractures in patients treated with alendronate: a register-based national cohort study. *JBMR*, doi: 10.1359/JBMR.081247.

1  
2  
3  
4  
5  
6  
7  
8  
9  
10  
11  
12  
13  
14  
15  
16  
17  
18  
19  
20  
21  
22  
23  
24  
25  
26  
27  
28  
29  
30  
31  
32  
33  
34  
35  
36  
37  
38  
39  
40  
41  
42  
43  
44  
45  
46  
47  
48  
49  
50  
51  
52  
53  
54  
55  
56  
57  
58  
59  
60

<sup>16</sup> Abrahamsen B, Eiken P, and Eastell R. Cumulative Alendronate Dose and the Long-Term Absolute Risk of Subtrochanteric and Diaphyseal Femur Fractures: A Register-Based National Cohort Analysis *J Clin Endocrin Metab*, doi:10.1210/jc.2010-1571

<sup>17</sup> Salvador JC, Moreno D, Sonogo LA, et al. El Proyecto BIFAP: Base de datos para la Investigación. *Aten Primaria* 2002; 30: 655-661.

<sup>18</sup> Agencia Española de Medicamentos y Productos Sanitarios. Proyecto BIFAP <http://www.bifap.org/summary.php>

<sup>19</sup> Whitaker M, Guo J, Kehoe T, et al. Bisphosphonates for osteoporosis. Where do we go from here? *N Engl J Med* 2012; May 9, 2012 (10.1056/NEJMp1202619)

<sup>20</sup> Vlad SC, Zhu Y, Niu J, et al. Bisphosphonate use may be a risk factor for osteonecrosis at any site: a self-controlled case series analysis [abstract]. 27th ICPE: International Conference on Pharmacoepidemiology & Therapeutic Risk Management. Chicago, 2011;[274]

Table 1. Characteristics of cases and controls

|                                                | Cases      | Controls   |
|------------------------------------------------|------------|------------|
| N                                              | 2009       | 10045      |
| Age, years ( $\pm$ SD)                         | 82.4 (6.6) | 82.4 (6.6) |
| Smoking                                        |            |            |
| Non-current smoker, %                          | 69.5       | 73.4       |
| Current smoker, %                              | 2.7        | 2.0        |
| Not recorded, %                                | 27.8       | 24.6       |
| Alcoholism, %                                  | 0.4        | 0.2        |
| Body mass index, kg/m <sup>2</sup> ( $\pm$ SD) | 27.2 (5.0) | 29.0 (5.0) |
| <20 kg/m <sup>2</sup> , %                      | 2.7        | 1.0        |
| 20-<25 kg/m <sup>2</sup> , %                   | 17.6       | 12.2       |
| 25-<30 kg/m <sup>2</sup> , %                   | 25.5       | 28.9       |
| $\geq$ 30 kg/m <sup>2</sup> , %                | 19.8       | 30.8       |
| Not recorded, %                                | 34.4       | 27.1       |
| <b>Comorbidities</b>                           |            |            |
| Previous fracture, %                           | 17.2       | 10.1       |
| Kidney disease, %                              | 4.9        | 3.6        |
| Malabsorption, %                               | 2.3        | 2.1        |
| Stroke, %                                      | 10.7       | 6.2        |
| Dementia, %                                    | 14.6       | 6.2        |
| Rheumatoid arthritis, %                        | 2.3        | 1.3        |
| Diabetes, %                                    | 22.2       | 17.7       |
| Epilepsy, %                                    | 1.4        | 0.9        |
| Parkinson disease, %                           | 4.9        | 1.9        |
| Thyroid disease, %                             | 10.2       | 10.8       |
| <b>Use of medication</b>                       |            |            |
| PPI or H2 receptor blocker, %                  | 38.2       | 34.0       |
| Anxiolytic, %                                  | 29.1       | 24.8       |
| Antidepressants, %                             | 22.6       | 13.8       |
| Antihypertensives, %                           | 56.8       | 61.6       |
| Oral corticosteroids, %                        | 8.0        | 7.4        |
| Sedatives, %                                   | 11.8       | 9.3        |
| Raloxifene, %                                  | 0.3        | 0.5        |
| Hormone replacement therapy, %                 | 0.0        | 0.0        |
| Thiazolidinedione, %                           | 0.3        | 0.2        |

Values correspond to percentage or means (standard deviation)

1  
2  
3  
4  
5  
6  
7  
8  
9  
10  
11  
12  
13  
14  
15  
16  
17  
18  
19  
20  
21  
22  
23  
24  
25  
26  
27  
28  
29  
30  
31  
32  
33  
34  
35  
36  
37  
38  
39  
40  
41  
42  
43  
44  
45  
46  
47  
48  
49  
50  
51  
52  
53  
54  
55  
56  
57  
58  
59  
60

For peer review only

**Table 2. Association of any bisphosphonate use with the risk of hip fracture.**

|                         | Cases       | Controls    | Average cumulative duration (days) | Time since first BP prescription (days) | Model 1          | Model 2          |
|-------------------------|-------------|-------------|------------------------------------|-----------------------------------------|------------------|------------------|
|                         | n (%)       | n (%)       | Mean (SD)                          | Mean (SD)                               | OR (95% CI)      | OR (95% CI)      |
| Use                     |             |             |                                    |                                         |                  |                  |
| No use                  | 1726 (85.9) | 8838 (88.0) | -                                  | -                                       | 1 (ref.)         | 1 (ref.)         |
| Ever use                | 283 (14.1)  | 1207 (12.0) | 600 (556)                          | 968 (622)                               | 1.21 (1.05-1.39) | 1.09 (0.94-1.27) |
| Timing                  |             |             |                                    |                                         |                  |                  |
| No use                  | 1726 (85.9) | 8838 (88.0) | -                                  | -                                       | 1 (ref.)         | 1 (ref.)         |
| Past use                | 111 (5.5)   | 347 (3.5)   | 315(415)                           | 1164 (601)                              | 1.63 (1.31-2.04) | 1.50 (1.19-1.89) |
| Recent use              | 43 (2.1)    | 127 (1.3)   | 515(521)                           | 774 (599)                               | 1.74 (1.22-2.47) | 1.34 (0.92-1.95) |
| Current use             | 129 (6.4)   | 733 (7.3)   | 769(563)                           | 903 (612)                               | 0.90 (0.74-1.10) | 0.84 (0.68-1.03) |
| p for trend             |             |             |                                    |                                         | 0.54             | 0.53             |
| Duration                |             |             |                                    |                                         |                  |                  |
| Never use               | 1726 (85.9) | 8838 (88.0) | -                                  | -                                       | 1 (ref.)         | 1 (ref.)         |
| ≤1 yr                   | 139 (6.9)   | 533 (5.3)   | 147 (106)                          | 687 (590)                               | 1.34 (1.10-1.63) | 1.20 (0.97-1.47) |
| >1 yr - ≤3 yr           | 92 (4.6)    | 458 (4.6)   | 684 (211)                          | 956 (419)                               | 1.03 (0.82-1.30) | 0.94 (0.74-1.20) |
| >3 yr                   | 52 (2.6)    | 216 (2.2)   | 1566 (375)                         | 1698 (437)                              | 1.25 (0.91-1.70) | 1.15 (0.82-1.60) |
| p for trend             |             |             |                                    |                                         | 0.16*            | 0.63*            |
| Time since first BP use |             |             |                                    |                                         |                  |                  |
| No use                  | 1726 (85.9) | 8838 (88.0) | -                                  | -                                       | 1 (ref.)         | 1 (ref.)         |
| <1 yr                   | 41 (2.0)    | 222 (2.2)   | 140 (99)                           | 194 (103)                               | 0.95 (0.67-1.33) | 0.85 (0.60-1.21) |
| 1 - <3 yr               | 120 (6.0)   | 546 (5.4)   | 454 (299)                          | 727 (209)                               | 1.13 (0.92-1.38) | 1.02 (0.82-1.26) |
| ≥3 yr                   | 122 (6.1)   | 439 (4.4)   | 990 (660)                          | 1618 (445)                              | 1.44 (1.17-1.78) | 1.32 (1.05-1.65) |
| p for trend**           |             |             |                                    |                                         | 0.0008           | 0.03             |

Model 1: Conditional logistic regression model; Model 2: Conditional logistic regression model adjusted for smoking, BMI, alcoholism, previous fracture, kidney disease, malabsorption, stroke, dementia, rheumatoid arthritis, diabetes, epilepsy, Parkinson disease, and thyroid disease, PPI (no use, ≤1 yr, >1 yr), anxiolytics, sedatives, antidepressants, antihypertensives, oral corticosteroids (no use, ≤1 yr, >1 yr), raloxifene, hormone replacement therapy, and thiazolidinediones

\* Modeled as the median duration of use in each category; \*\* Modeled as time in days since first bisphosphonate prescription (0 for no users)



**Table 3. Risk of hip fracture by time since first prescription for bisphosphonates**

|                         | Cases      | Controls   | Average cumulative duration (days) | Time since first BP prescription (days) | Model 1          | Model 2          |
|-------------------------|------------|------------|------------------------------------|-----------------------------------------|------------------|------------------|
|                         | n (%)      | n (%)      | Mean (SD)                          | Mean (SD)                               | OR (95% CI)      | OR (95% CI)      |
| Time since first BP use |            |            |                                    |                                         |                  |                  |
| <1 yr                   | 41 (14.5)  | 222 (18.4) | 157 (133)                          | 194 (103)                               | 1 (ref)          | 1 (ref)          |
| 1 - <3yr                | 120 (42.4) | 546 (45.2) | 535 (451)                          | 727 (209)                               | 1.23 (0.68-2.23) | 1.49 (0.71-3.13) |
| ≥3 yr                   | 122 (43.1) | 439 (36.4) | 1138 (873)                         | 1618 (445)                              | 1.79 (0.94-3.40) | 2.21 (0.96-5.09) |
| p for trend*            |            |            |                                    |                                         | 0.03             | 0.03             |

Model 1: Conditional logistic regression model

Model 2: Conditional logistic regression model adjusted for smoking, BMI, alcoholism, previous fracture, kidney disease, malabsorption, stroke, dementia, rheumatoid arthritis, diabetes, epilepsy, Parkinson disease, and thyroid disease, PPI (no use, ≤1 yr, >1 yr), anxiolytics, sedatives, antidepressants, antihypertensives, oral corticosteroids (no use, ≤1 yr, >1 yr), raloxifene, hormone replacement therapy, and thiazolidinediones

\* Modeled as time in days since first bisphosphonate prescription

**Table 4. Association of ever use of individual bisphosphonates with the risk of hip fracture.**

|             | Cases       | Controls    | Average duration | Time since first prescription | Model 1          | Model 2          |
|-------------|-------------|-------------|------------------|-------------------------------|------------------|------------------|
|             | n (%)       | n (%)       | (days)           | (days)                        | OR (95% CI)      | OR (95% CI)      |
| Never use   | 1726 (85.9) | 8838 (88.0) | -                | -                             | 1 (ref.)         | 1 (ref.)         |
| Alendronate | 128 (6.4)   | 598 (6.0)   | 599 (566)        | 956 (603)                     | 1.10 (0.90-1.34) | 0.99 (0.81-1.22) |
| Risedronate | 95 (4.7)    | 438 (4.4)   | 508 (459)        | 822 (503)                     | 1.12 (0.89-1.41) | 1.02 (0.81-1.30) |
| Etidronate  | 19 (1.0)    | 63 (0.6)    | 818 (629)        | 1478 (746)                    | 1.55 (0.92-2.59) | 1.56 (0.91-2.65) |
| Ibandronate | 7 (0.4)     | 9 (0.1)     | 161 (137)        | 239 (151)                     | 4.18 (1.55-11.2) | 3.67 (1.31-10.3) |
| Switcher    | 34 (1.7)    | 99 (1.0)    | 898 (676)        | 1397 (714)                    | 1.80 (1.21-2.68) | 1.63 (1.07-2.47) |

Model 1: Conditional logistic regression model

Model 2: Conditional logistic regression model adjusted for smoking, BMI, and alcoholism, previous fracture, kidney disease, malabsorption, stroke, dementia, rheumatoid arthritis, diabetes, epilepsy, Parkinson disease, and thyroid disease, PPI (no use, <=1 yr, >1 yr), anxiolytics, sedatives, antidepressants, antihypertensives, oral corticosteroids (no use, <=1 yr, >1 yr), raloxifene, hormone replacement therapy, and thiazolidinediones

Figure 1. Selection of study population

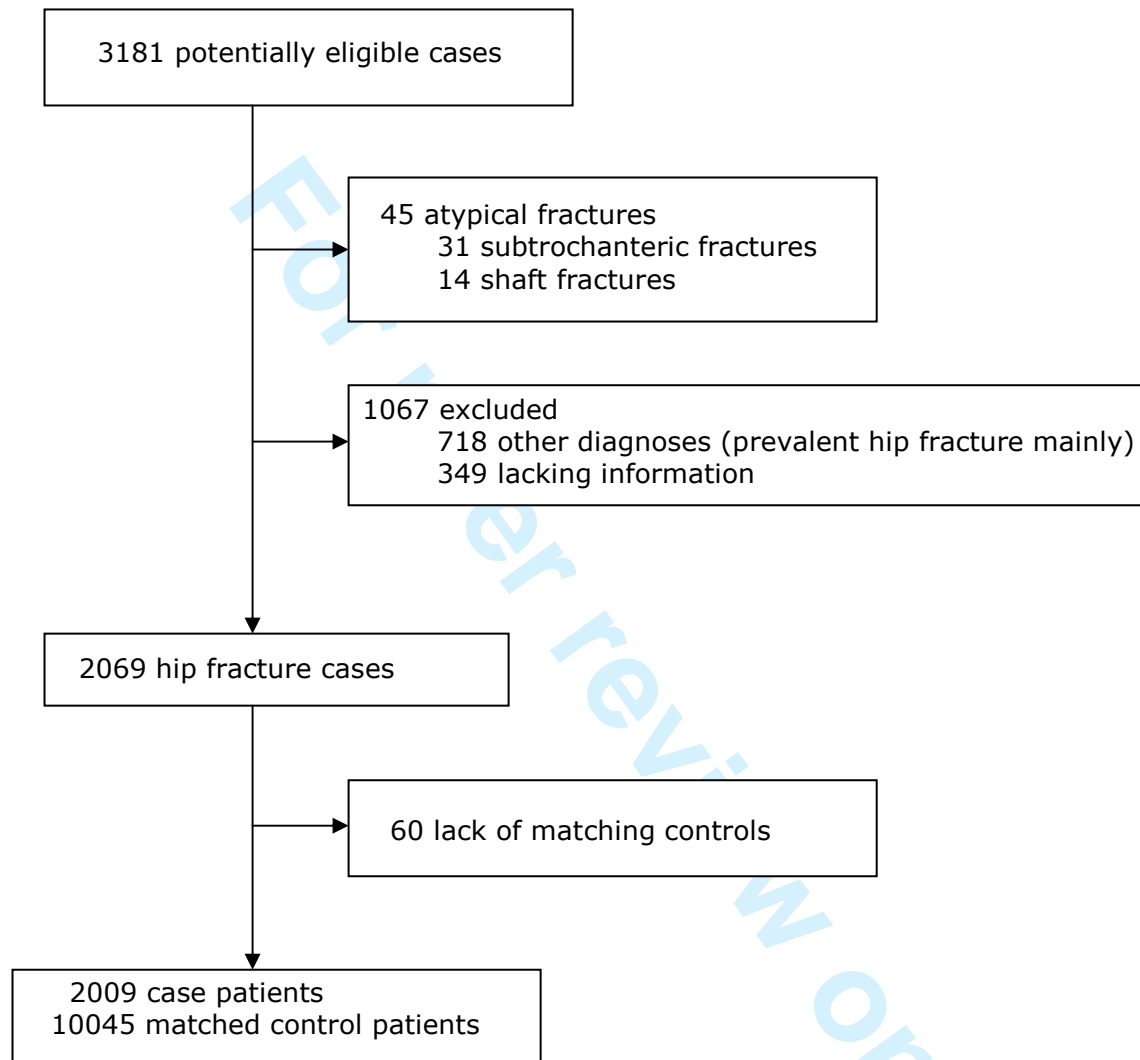

Figure 1. Selection of study population

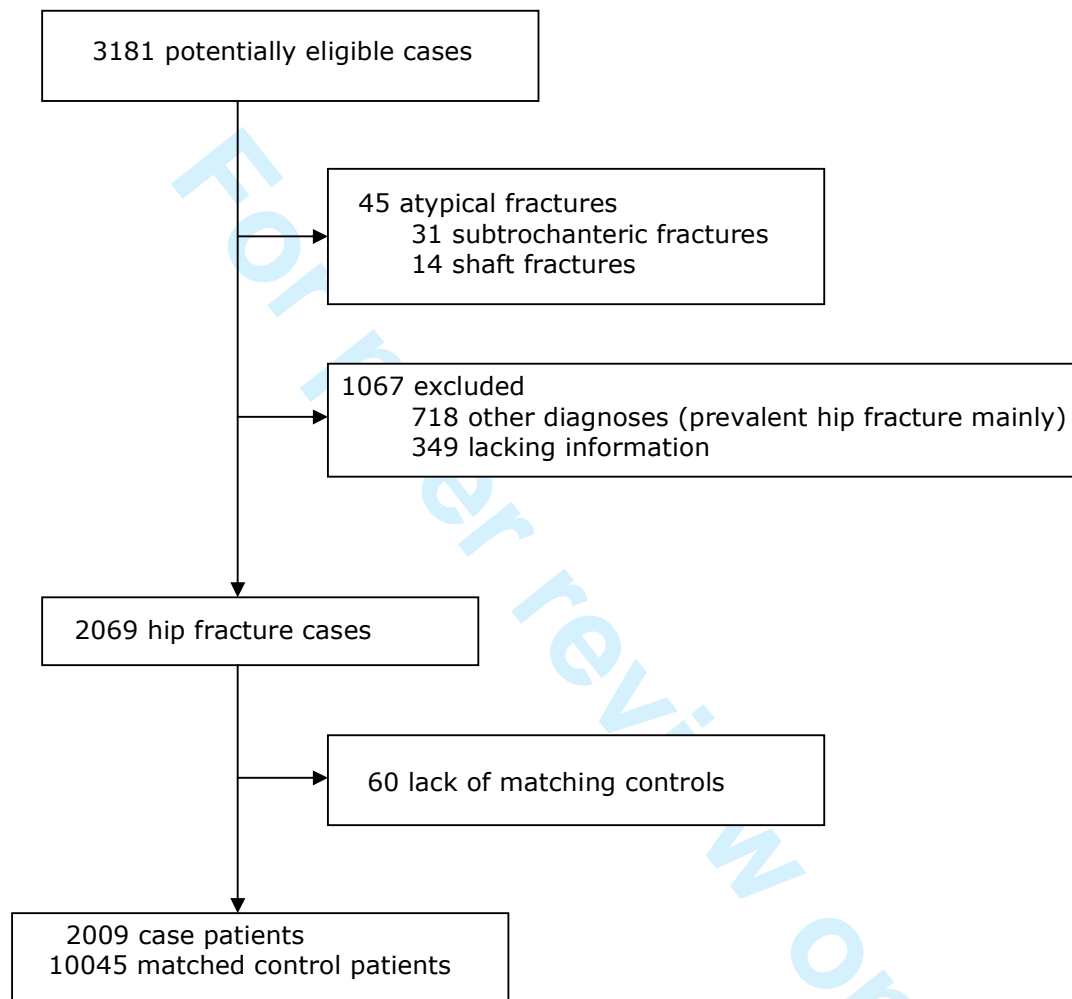

**STROBE 2007 (v4) checklist of items to be included in reports of observational studies in epidemiology\***  
**Checklist for cohort, case-control, and cross-sectional studies (combined)**

| Section/Topic             | Item # | Recommendation                                                                                                                                                                                                                                                                                                                                                                                                                                                                   | Reported on page # |
|---------------------------|--------|----------------------------------------------------------------------------------------------------------------------------------------------------------------------------------------------------------------------------------------------------------------------------------------------------------------------------------------------------------------------------------------------------------------------------------------------------------------------------------|--------------------|
| Title and abstract        | 1      | (a) Indicate the study's design with a commonly used term in the title or the abstract. <b>OK</b>                                                                                                                                                                                                                                                                                                                                                                                |                    |
|                           |        | (b) Provide in the abstract an informative and balanced summary of what was done and what was found <b>OK</b>                                                                                                                                                                                                                                                                                                                                                                    |                    |
| <b>Introduction</b>       |        |                                                                                                                                                                                                                                                                                                                                                                                                                                                                                  |                    |
| Background/rationale      | 2      | Explain the scientific background and rationale for the investigation being reported <b>OK</b>                                                                                                                                                                                                                                                                                                                                                                                   |                    |
| Objectives                | 3      | State specific objectives, including any pre-specified hypotheses <b>OK</b>                                                                                                                                                                                                                                                                                                                                                                                                      |                    |
| <b>Methods</b>            |        |                                                                                                                                                                                                                                                                                                                                                                                                                                                                                  |                    |
| Study design              | 4      | Present key elements of study design early in the paper <b>OK</b>                                                                                                                                                                                                                                                                                                                                                                                                                |                    |
| Setting                   | 5      | Describe the setting, locations, and relevant dates, including periods of recruitment, exposure, follow-up, and data collection <b>OK</b>                                                                                                                                                                                                                                                                                                                                        |                    |
| Participants              | 6      | (a) <i>Cohort study</i> —Give the eligibility criteria, and the sources and methods of selection of participants. Describe methods of follow-up<br><i>Case-control study</i> —Give the eligibility criteria, and the sources and methods of case ascertainment and control selection. Give the rationale for the choice of cases and controls <b>OK</b><br><i>Cross-sectional study</i> —Give the eligibility criteria, and the sources and methods of selection of participants |                    |
|                           |        | (b) <i>Cohort study</i> —For matched studies, give matching criteria and number of exposed and unexposed<br><i>Case-control study</i> —For matched studies, give matching criteria and the number of controls per case <b>OK</b>                                                                                                                                                                                                                                                 |                    |
| Variables                 | 7      | Clearly define all outcomes, exposures, predictors, potential confounders, and effect modifiers. Give diagnostic criteria, if applicable <b>OK</b>                                                                                                                                                                                                                                                                                                                               |                    |
| Data sources/ measurement | 8*     | For each variable of interest, give sources of data and details of methods of assessment (measurement). Describe comparability of assessment methods if there is more than one group <b>OK</b>                                                                                                                                                                                                                                                                                   |                    |
| Bias                      | 9      | Describe any efforts to address potential sources of bias <b>OK</b>                                                                                                                                                                                                                                                                                                                                                                                                              |                    |
| Study size                | 10     | Explain how the study size was arrived at <b>OK</b>                                                                                                                                                                                                                                                                                                                                                                                                                              |                    |
| Quantitative variables    | 11     | Explain how quantitative variables were handled in the analyses. If applicable, describe which groupings were chosen and why <b>OK</b>                                                                                                                                                                                                                                                                                                                                           |                    |
| Statistical methods       | 12     | (a) Describe all statistical methods, including those used to control for confounding <b>OK</b>                                                                                                                                                                                                                                                                                                                                                                                  |                    |
|                           |        | (b) Describe any methods used to examine subgroups and interactions <b>OK</b>                                                                                                                                                                                                                                                                                                                                                                                                    |                    |
|                           |        | (c) Explain how missing data were addressed <b>OK</b>                                                                                                                                                                                                                                                                                                                                                                                                                            |                    |
|                           |        | (d) <i>Cohort study</i> —If applicable, explain how loss to follow-up was addressed<br><i>Case-control study</i> —If applicable, explain how matching of cases and controls was addressed <b>OK</b>                                                                                                                                                                                                                                                                              |                    |

|                          |     |                                                                                                                                                                                                                        |  |
|--------------------------|-----|------------------------------------------------------------------------------------------------------------------------------------------------------------------------------------------------------------------------|--|
|                          |     | <i>Cross-sectional study</i> —If applicable, describe analytical methods taking account of sampling strategy                                                                                                           |  |
|                          |     | (e) Describe any sensitivity analyses                                                                                                                                                                                  |  |
| <b>Results</b>           |     |                                                                                                                                                                                                                        |  |
| Participants             | 13* | (a) Report numbers of individuals at each stage of study—eg numbers potentially eligible, examined for eligibility, confirmed eligible, included in the study, completing follow-up, and analysed <b>OK</b>            |  |
|                          |     | (b) Give reasons for non-participation at each stage <b>Not applicable</b>                                                                                                                                             |  |
|                          |     | (c) Consider use of a flow diagram <b>Not applicable</b>                                                                                                                                                               |  |
| Descriptive data         | 14* | (a) Give characteristics of study participants (eg demographic, clinical, social) and information on exposures and potential confounders <b>OK</b>                                                                     |  |
|                          |     | (b) Indicate number of participants with missing data for each variable of interest <b>OK</b>                                                                                                                          |  |
|                          |     | (c) <i>Cohort study</i> —Summarise follow-up time (eg, average and total amount)                                                                                                                                       |  |
| Outcome data             | 15* | <i>Cohort study</i> —Report numbers of outcome events or summary measures over time                                                                                                                                    |  |
|                          |     | <i>Case-control study</i> —Report numbers in each exposure category, or summary measures of exposure <b>OK</b>                                                                                                         |  |
|                          |     | <i>Cross-sectional study</i> —Report numbers of outcome events or summary measures                                                                                                                                     |  |
| Main results             | 16  | (a) Give unadjusted estimates and, if applicable, confounder-adjusted estimates and their precision (eg, 95% confidence interval). Make clear which confounders were adjusted for and why they were included <b>OK</b> |  |
|                          |     | (b) Report category boundaries when continuous variables were categorized <b>OK</b>                                                                                                                                    |  |
|                          |     | (c) If relevant, consider translating estimates of relative risk into absolute risk for a meaningful time period                                                                                                       |  |
| Other analyses           | 17  | Report other analyses done—eg analyses of subgroups and interactions, and sensitivity analyses <b>OK</b>                                                                                                               |  |
| <b>Discussion</b>        |     |                                                                                                                                                                                                                        |  |
| Key results              | 18  | Summarise key results with reference to study objectives <b>OK</b>                                                                                                                                                     |  |
| Limitations              | 19  | Discuss limitations of the study, taking into account sources of potential bias or imprecision. Discuss both direction and magnitude of any potential bias <b>OK</b>                                                   |  |
| Interpretation           | 20  | Give a cautious overall interpretation of results considering objectives, limitations, multiplicity of analyses, results from similar studies, and other relevant evidence <b>OK</b>                                   |  |
| Generalisability         | 21  | Discuss the generalisability (external validity) of the study results <b>OK</b>                                                                                                                                        |  |
| <b>Other information</b> |     |                                                                                                                                                                                                                        |  |
| Funding                  | 22  | Give the source of funding and the role of the funders for the present study and, if applicable, for the original study on which the present article is based <b>OK</b>                                                |  |

\*Give information separately for cases and controls in case-control studies and, if applicable, for exposed and unexposed groups in cohort and cross-sectional studies.

**Note:** An Explanation and Elaboration article discusses each checklist item and gives methodological background and published examples of transparent reporting. The STROBE checklist is best used in conjunction with this article (freely available on the Web sites of PLoS Medicine at <http://www.plosmedicine.org/>, Annals of Internal Medicine at <http://www.annals.org/>, and Epidemiology at <http://www.epidem.com/>). Information on the STROBE Initiative is available at [www.strobe-statement.org](http://www.strobe-statement.org).



**ORAL BISPHOSPHONATES MAY NOT DECREASE HIP FRACTURE RISK IN ELDERLY SPANISH WOMEN**

|                                 |                                                                                                                                                                                                                                                                                                                |
|---------------------------------|----------------------------------------------------------------------------------------------------------------------------------------------------------------------------------------------------------------------------------------------------------------------------------------------------------------|
| Journal:                        | <i>BMJ Open</i>                                                                                                                                                                                                                                                                                                |
| Manuscript ID:                  | bmjopen-2012-002084.R1                                                                                                                                                                                                                                                                                         |
| Article Type:                   | Research                                                                                                                                                                                                                                                                                                       |
| Date Submitted by the Author:   | 18-Dec-2012                                                                                                                                                                                                                                                                                                    |
| Complete List of Authors:       | Erviti, Juan; Navarre Health Service, Drug Information Unit<br>Alonso, Alvaro; University of Minnesota, School of Public Health; University of Navarre, School of Medicine<br>Gorricho, Javier; Navarre Health Service, Drug Information Unit<br>López, Antonio; Navarre Health Service, Drug Information Unit |
| <b>Primary Subject Heading</b>: | Pharmacology and therapeutics                                                                                                                                                                                                                                                                                  |
| Secondary Subject Heading:      | Epidemiology                                                                                                                                                                                                                                                                                                   |
| Keywords:                       | CLINICAL PHARMACOLOGY, EPIDEMIOLOGY, PRIMARY CARE                                                                                                                                                                                                                                                              |
|                                 |                                                                                                                                                                                                                                                                                                                |

SCHOLARONE™  
Manuscripts

For peer review only

**TITLE****ORAL BISPHOSPHONATES MAY NOT DECREASE HIP FRACTURE RISK  
IN ELDERLY SPANISH WOMEN****AUTHORS**

Juan Erviti, Álvaro Alonso<sup>1,2</sup>, Javier Gorricho, Antonio López

Drug Prescribing Service, Navarre Regional Health Service, Pamplona, Navarre, Spain;

<sup>1</sup>School of Public Health, University of Minnesota, Minneapolis, Minnesota, United States;

<sup>2</sup>School of Medicine, University of Navarre, Pamplona, Navarre, Spain.

**ARTICLE SUMMARY****Article Focus**

. The hypothesis of this study is that oral bisphosphonates may not be effective in reducing hip fracture risk in clinical practice in the long-term use.

**Key messages**

. Ever use of oral bisphosphonates was not associated with a decreased risk of hip fracture in women aged 65 or older as compared to never use.

. No association between hip fracture risk and cumulative duration of bisphosphonate treatment was observed.

. When treatment duration is analysed as time since first prescription, a statistically significant increased risk for hip fracture was observed in patients exposed to bisphosphonates over 3 years.

**Strengths and limitations**

. The main strength of this study is that it sheds light on the effects of oral bisphosphonates on hip fracture risk in clinical practice in a Mediterranean population.

. One of the main limitations is the relatively short follow-up period.

**ABSTRACT**



## Objectives

To evaluate the association between long-term use of bisphosphonates and the risk of hip fracture compared to never use among women aged 65 years or older.

## Design

Case-control study nested in a cohort.

## Setting

General practice research database operated by the Spanish Medicines Agency.

## Participants:

Cases of hip fracture were defined as women aged 65 years or older with a validated first diagnosis of hip fracture between 2005 and 2008. Five controls free of hip fracture were matched on age and calendar year with each case.

## Interventions

Information on bisphosphonate use, hip fractures, comedication, and comorbidities was collected.

## Primary outcomes

Hip fracture risk comparing bisphosphonate users vs never users

## Secondary outcomes

Hip fracture risk comparing bisphosphonate users vs never users by individual drugs

## Results

The study included 2,009 incident hip fractures and 10,045 matched controls. Hip fracture risk did not differ between bisphosphonate users and never users, adjusted OR = 1.09 (95% CI, 0.94-1.27). No association between hip fracture risk and cumulative duration of bisphosphonate treatment was observed. However, when treatment duration is analysed as time since first prescription, hip fracture risk of the different subgroups compared to never users obtained were as follows: <1 year, OR 0.85 (95%CI, 0.60-1.21); 1 to <3 years, OR 1.02 (95%CI 0.82-1.26); ≥ 3 years, OR 1.32 (95%CI 1.05-1.65) (p for trend = 0.03).

## Conclusions

1  
2  
3 Ever use of oral bisphosphonates was not associated with a decreased risk  
4 of hip fracture in women aged 65 or older as compared to never use. No  
5 association between hip fracture risk and cumulative duration of  
6 bisphosphonate treatment was observed. However, when treatment  
7 duration is analysed as time since first prescription, a statistically significant  
8 increased risk for hip fracture was observed in patients exposed to  
9 bisphosphonates over 3 years.  
10  
11

## 12 **Trial Registration**

13  
14 Spanish Ministry of Health. TRA-071  
15  
16

## 17 **INTRODUCTION**

### 18 **Background**

19  
20  
21  
22  
23  
24  
25  
26  
27  
28  
29  
30  
31  
32  
33  
34  
35  
36  
37  
38  
39  
40  
41  
42  
43  
44  
45  
46  
47  
48  
49  
50  
51  
52  
53  
54  
55  
56  
57  
58  
59  
60

When bisphosphonates came onto the market, they had demonstrated efficacy in the improvement of bone density, but there was no evidence for reduction of hip fractures. They were introduced on the theoretical assumption that the increase in bone density implied strengthening of the bone structure, and therefore a reduction in the risk of fracture.

In most pivotal trials comparing the effects of alendronate,<sup>1-4</sup> risedronate,<sup>5-7</sup> or ibandronate<sup>8</sup> versus placebo hip fractures were considered as secondary endpoints and outcomes did not show any clear potential benefit in decreasing hip fracture risk. Several meta-analyses of alendronate and risedronate have been carried out and a statistically significant benefit of these drugs over placebo is reported. However, the clinical significance of the findings is debateable and methodology biases are also present in the reviews.<sup>9</sup> A recent meta-analysis obtained similar results. However, trials' quality assessment was carried out and revealed an unclear or high risk of bias in approximately 75% of the trials. This means that the small significant reduction in hip fracture may not be real, or at best, is an exaggeration of the real benefit.<sup>10</sup>

In 2006 the longest ever clinical trial evaluating the effects of bisphosphonates was published. After 5 years under alendronate, women were randomized to either continue taking the drug or receive placebo for another five years. Discontinuation of alendronate for up to five years did not change numerically or statistically either nonspine or hip fracture incidence.<sup>11</sup> However no comparison between alendronate use versus no use was established. This prompted us to carry out the present study.<sup>12</sup>

The long-term use of bisphosphonates has been associated with deleterious effects on bone structure such as osteonecrosis of the jaw, atypical

1  
2  
3 fractures (subtrochanteric and diaphyseal), and bone pain that prompted  
4 several safety communications issued by both the FDA and EMA.<sup>13,14</sup>  
5

6 In 2008 a cohort study in Danish women with no previous hip fracture was  
7 published. The incidence of hip fractures increased in the group treated with  
8 alendronate by 50% in relative terms and by 6 cases per 1,000 women-  
9 years in absolute terms<sup>15</sup>. Updated information from this Danish cohort was  
10 published in 2010 and the increased incidence of hip fractures in women  
11 taking alendronate was confirmed.<sup>16</sup>  
12  
13

## 14 15 16 **Objective**

17 The aim of this study is to evaluate the association between long-term use  
18 of bisphosphonates and the risk of hip fracture compared to never use  
19 among women aged 65 years or older.  
20  
21  
22  
23

## 24 25 **METHODS**

### 26 27 **Study design and setting**

28 We carried out a case-control study nested in a cohort in Spain using the  
29 information from BIFAP (*Base de Datos para la Investigación*  
30 *Farmacoepidemiológica en Atención Primaria*, Database for  
31 *Pharmacoepidemiologic Research in Primary Care*). This is a longitudinal  
32 population-based database kept by the Spanish Agency for Medicines and  
33 Medical Devices that collates, from 2001 onwards, the computerized  
34 medical records of more than 1,800 physicians throughout Spain. It includes  
35 anonymized information on over 3.2 million patients, totalling over 13.7  
36 million person-years of follow up.<sup>17,18</sup>  
37  
38  
39  
40

41 This project was approved by the Navarre Research Ethics Board,  
42 Pamplona, Spain. All data were anonymized and no written consent was  
43 necessary for this type of study according to the Spanish regulations (law  
44 41/2002, article 16).  
45  
46  
47  
48

### 49 50 **Participants**

51 Cases were defined as women aged 65 years or older with a first diagnosis  
52 of hip fracture, using the ICPC-1 codes, recorded between 01/01/2005 and  
53 31/12/2008, and with at least 1 year of follow-up in BIFAP before the event  
54 date. The date of hospitalization served as the index date. All hip fracture  
55 cases were double-checked and validated by both BIFAP and the research  
56 team. We excluded women with any history of cancer, Paget disease,  
57  
58  
59  
60

1  
2  
3 prevalent hip fracture and fractures resulting from trauma or motor vehicle  
4 collisions. For each case, 5 controls with no history of hip fracture by the  
5 time of the index date of their corresponding case were selected, matched  
6 by same age and calendar year of enrolment in BIFAP.  
7

### 8 **Medication use and other covariates**

9  
10 Use of bisphosphonates before the index date was obtained from the  
11 computerized database. Duration of bisphosphonate exposure was  
12 evaluated by examining prescriptions for oral alendronate, risedronate,  
13 ibandronate or etidronate from the beginning of therapy to the index date  
14 or the corresponding date among controls (ATC codes: alendronate,  
15 M05BA04; alendronate plus vitamin D, M05BB; risedronate, M05BA07 and  
16 ibandronate, M05BA06).  
17

18  
19 Individuals were classified as ever vs never users. Ever users were also  
20 divided into *current users* (if most recent prescription lasted through index  
21 date or ended in the month before it), *recent users* (if most recent  
22 prescription ended between 1 and 6 months before index date) and *past*  
23 *users* (if most recent prescription ended more than 6 months before index  
24 date).  
25  
26  
27

28  
29 In order to assess the effects of treatment length on the outcomes four  
30 different subgroups were considered based on cumulative duration of actual  
31 treatment, namely 30 days or less; >30 days to  $\leq 1$  year; >1 to  $\leq 3$  years  
32 and over 3 years. The effects of time of bisphosphonate exposure on hip  
33 fracture risk were also analyzed. Exposure was measured as the time (in  
34 days) since the first prescription.  
35

36  
37 Information on comorbidities (ICPC-1 codes) and use of other medications  
38 (ATC codes) was obtained. Patients were considered exposed if the most  
39 recent prescription lasted through index date or ended in the month before  
40 it. Other variables such as weight (kg), height (cm), body mass index  
41 ( $\text{kg}/\text{m}^2$ ) and smoking status (yes/no/past smoker) were obtained as well.  
42  
43

### 44 **Statistical methods**

45  
46 Between 2005 and 2008 we expected to find some 2,000 cases and 10,000  
47 controls in our database. This would provide statistical power >90% to  
48 detect a change >20% in the risk of having hip fracture associated to  
49 bisphosphonate use with an alpha risk of 5% and a prevalence of exposure  
50 of 20%.  
51

52  
53 We used conditional logistic regression to estimate the odds ratios (ORs)  
54 and 95 percent confidence intervals (CIs) for the association between  
55 bisphosphonate exposure and hip fractures. Bisphosphonate use was  
56 categorized as ever vs never. In separate analyses, current, recent, or past  
57 use was also evaluated. Treatment duration was assessed as well and  
58 results were tested to identify a trend. The level of significance was  
59  
60

1  
2  
3 established at  $p = 0.05$ . In the duration analysis adjusted for exposure,  
4 never users was considered as the reference group. The results were also  
5 compared to bisphosphonate users for less than one year as a sensitivity  
6 analysis in case of selection bias.  
7

8 An initial "model 1" adjusted only for matching variables. A second "model  
9 2" adjusted additionally for smoking, BMI, alcoholism, previous fracture,  
10 kidney disease, malabsorption, stroke, dementia, rheumatoid arthritis,  
11 diabetes, epilepsy, Parkinson disease, thyroid disease, PPI (no use,  $\leq 1$  yr,  
12  $> 1$  yr), anxiolytics, sedatives, antidepressants, antihypertensives, oral  
13 corticosteroids (no use,  $\leq 1$  yr,  $> 1$  yr), raloxifene, hormone replacement  
14 therapy, and thiazolidinediones.  
15

## 16 17 18 **RESULTS**

### 19 ***Participants***

20  
21  
22 Between 2005 and 2008, 3,181 potentially eligible cases were registered.  
23 Out of them we validated 2,069 hip fractures and 45 atypical fractures (31  
24 subtrochanteric and 14 shaft fractures). Of the remainder 1,067 records  
25 were classified as "no case", 718 "other diagnoses" and 349 "lacking  
26 information". Sixty cases were excluded due to lack of matching controls. A  
27 total of 2,009 cases were obtained and 10,045 matching controls were  
28 selected (figure 1).  
29

30  
31 The average age of cases was  $82.4 \pm 6.6$  years. In general terms co-  
32 morbidities and drug use was more prevalent in cases while smoking status  
33 and BMI were similar between cases and controls (table 1).  
34

### 35 ***Outcome data***

36  
37  
38 Hip fractures were more frequent among bisphosphonate users, 283  
39 (14.1%) compared to never users, 1207 (12.0%). Results according to  
40 timing, duration, and bisphosphonate exposure are described in table 2.  
41

### 42 ***Main results***

43  
44  
45 Ever users of bisphosphonates had a higher risk of hip fracture compared to  
46 never users (unadjusted OR = 1.21, 95%CI, 1.05-1.39). After adjusting for  
47 co-medication and pathologies no significant differences were found  
48 between bisphosphonate users and never users, OR = 1.09 (95%CI, 0.94-  
49 1.27).  
50

51  
52  
53 No association between hip fracture risk and cumulative duration of  
54 bisphosphonate treatment was observed:  $< 1$  year, OR 1.20 (95% CI, 0.97-  
55 1.47); 1 to  $< 3$  years, OR 0.94 (95% CI, 0.74-1.20);  $\geq 3$  years, OR 1.15  
56 (95%CI, 0.82-1.60) ( $p$  for trend = 0.63). However, when treatment  
57  
58  
59  
60

1  
2  
3 duration is analysed as time since first prescription, hip fracture risk of the  
4 different subgroups compared to never users obtained were as follows: <1  
5 year, OR 0.85 (95%CI, 0.60-1.21); 1 to <3 years, OR 1.02 (95%CI 0.82-  
6 1.26); ≥ 3 years, OR 1.32 (95%CI 1.05-1.65) (p for trend = 0.03). If  
7 women exposed to bisphosphonates during less than one year was  
8 considered as the reference group, hip fracture risk observed in the  
9 different subgroups were: 1 to <3 years, OR 1.56 (95%CI 0.73-3.31); ≥ 3  
10 years, OR 2.31 (95%CI 1.00-5.36) (p for trend = 0.03) (tables 2 and 3).

11  
12  
13  
14 No significant trend was observed for timing (past, recent and current use).  
15 Past use of bisphosphonates was associated with a statistically significant  
16 increase in hip fracture risk (OR = 1.50, 95%CI 1.19-1.89) while current or  
17 recent use was not (table 2).

18  
19  
20 No protective effect on hip fracture risk was observed when the results were  
21 analysed by individual drugs. On the contrary, a statistically significant  
22 increased risk was found for ibandronate users (OR = 3.67, 95%CI 1.31-  
23 10.3) and for switchers as well (OR = 1.63, 95%CI 1.07-2.47) (table 4).

## 24 25 26 27 **DISCUSSION**

### 28 29 **Key results**

30  
31 According to our findings oral bisphosphonates may not decrease hip  
32 fracture risk in elderly women. In order to reduce selection bias, results  
33 were adjusted for co-pathologies and medication. However, residual  
34 selection bias may still occur. In a cohort study in Danish women with a  
35 previous fracture but with no previous hip fracture, the risk of hip fracture  
36 was increased in the group treated with alendronate.<sup>15,16</sup> This study was  
37 performed on alendronate only whereas in our study all oral  
38 bisphosphonates were included. Our findings are in line with the Danish  
39 study in which a higher hip fracture risk was observed.

40  
41  
42  
43 A recent meta-analysis of clinical trials assessed the effects of  
44 bisphosphonates on hip and wrist fracture risk. Similar results to previous  
45 meta-analyses were observed, namely a 1% absolute reduction of hip  
46 fracture risk in bisphosphonate users. What is new about this publication is  
47 that trials' quality assessment was carried out and revealed an unclear or  
48 high risk of bias in approximately 75% of the trials. This means that the  
49 small significant reduction in hip fracture may not be real, or at best, is an  
50 exaggeration of the real benefit<sup>10</sup>[Error! Bookmark not defined.](#) which is in line with  
51 our findings.  
52  
53  
54  
55  
56  
57  
58  
59  
60

1  
2  
3 We evaluated the effects of treatment length and the results by individual  
4 drugs as secondary outcomes. No association between hip fracture risk and  
5 cumulative duration of bisphosphonate treatment was observed. However,  
6 fracture risk increased with longer exposure to bisphosphonates. A  
7 statistically significant trend for increased risk of hip fracture was observed  
8 among bisphosphonate users irrespective of whether the reference group  
9 was never users or women under treatment for less than one year. Results  
10 were tested against the two different reference groups because of the  
11 possible selection bias in any of them. The results were consistent in both  
12 analyses.  
13  
14

15  
16 According to the results by individual drugs, no protective effect was  
17 observed. On the contrary, a statistically significant increased risk was  
18 found for ibandronate users and for switchers as well. Probably ibandronate  
19 results in our study are conditioned by a small sample size.  
20  
21

22 No significant trend was observed for timing (past, recent and current use).  
23 Past users showed a statistically significant higher fracture risk when  
24 compared to never users while current or recent users did not. This could be  
25 interpreted as if bisphosphonates provided a protective effect on hip  
26 fracture risk that disappears after drug withdrawal. However there are some  
27 other possible explanations for this. First, treatment withdrawal could be  
28 more frequent in patients suffering from drug adverse reactions, in those  
29 who did not tolerate treatment, or had a poorer clinical status. All these  
30 patients have a higher fracture risk and selection bias is another possible  
31 explanation for a higher fracture risk in patients who stopped taking  
32 bisphosphonates.  
33  
34

35  
36 Second, bisphosphonates accumulate in bone structure and past users are  
37 exposed to the drug effects for many years after withdrawal. Given the  
38 relatively short follow-up period in this study, all patients are exposed to the  
39 drug effects irrespective of whether they are past, recent or current users.  
40 Thereby interpreting results according to these subgroups may be  
41 meaningless. The FLEX trial shows that there is no difference in hip fracture  
42 risk between past and current users. Past users had been under treatment  
43 for 5 years and had stopped taking the drug 5 years before assessment.  
44 This trial supports that alendronate accumulates in bone and past users are  
45 exposed to the drug effects for many years after withdrawal. Thereby it  
46 makes sense to consider exposure to bisphosphonates in the results  
47 analysis. Also we must take into account that in the FLEX trial there is no  
48 selection bias due to randomization, and consequently its findings support  
49 that the higher risk observed in the past users in our study may be related  
50 to a selection bias and a longer exposure to bisphosphonates in this  
51 subgroup as well.  
52  
53  
54  
55  
56  
57  
58  
59  
60

1  
2  
3 A recent article published by FDA researchers analysed the results of three  
4 long-term extension trials on alendronate, risedronate and zoledronic acid.  
5 Pooled data pertaining to patients who received continuous bisphosphonate  
6 treatment for 6 or more years resulted in fracture rates ranging from 9.3 to  
7 10.6%, whereas the rate for patients switched to placebo was 8.0 to 8.8%.  
8 These data raise the question on whether long-term use of bisphosphonates  
9 is beneficial for patients.<sup>19</sup>  
10  
11

12 With long-term use it is widely accepted that bisphosphonates may cause  
13 osteonecrosis of the jaw and atypical (subtrochanteric and diaphyseal)  
14 fractures as well. Recently, a self-controlled case series analysis showed  
15 that bisphosphonate use was associated with osteonecrosis at any site.<sup>20</sup>  
16 Deleterious effects on bone structure have been observed with  
17 bisphosphonates and denosumab as well but not with other osteoporosis  
18 drugs. Both type of drugs inhibit bone turnover and thereby bone strength  
19 may be weaker as a result of treatment. Besides bisphosphonates prolong  
20 secondary mineralization leading to increased bone density but decreased  
21 bone toughness due to a higher mineral content (brittle bones).<sup>21</sup> Since  
22 there is biological rationale to explain the harmful effects of  
23 bisphosphonates on bone, more long-term studies are needed to test our  
24 findings.  
25  
26  
27  
28  
29  
30

### 31 **Limitations**

32  
33 One of the main limitations in our study is the relatively short follow-up  
34 period. Besides, we relied on prescription data to determine duration of  
35 bisphosphonate exposure. It is sensible to think that real exposure will likely  
36 be lower than registered. In the clinical records included in the BIFAP  
37 database, X-ray images are not available which might occasionally lead to  
38 misclassification of cases. However we believe this may not be a relevant  
39 limitation yet hip fracture cases are described in detail in the surgical  
40 procedures.  
41  
42  
43

44 Another aspect to be pointed out is that ibandronate was marketed in Spain  
45 in January 2007 and in our study we included incident cases of hip fracture  
46 that occurred between 2005 and 2008. Thereby the exposure of both cases  
47 and controls to ibandronate is rather short-term.  
48

49 Confounding by indication is a possible bias of this study. Theoretically  
50 women in a poor baseline condition could be prescribed bisphosphonates to  
51 a greater extent when compared to women with a better health status. In  
52 order to minimize this bias, results were adjusted for previous fractures,  
53 comorbidities and use of other medications.  
54  
55

56 Bone mineral density determination is not a standard test available in the  
57 public health system in Spain. Thereby information on BMD in clinical  
58  
59  
60



1  
2  
3 records was rather scarce. However, this test has a very poor fracture risk  
4 predictive value and its clinical relevance can be challenged. When it comes  
5 to adjusting crude data we used other bone-related variables instead such  
6 as prevalence of previous fractures.  
7

8  
9 In our study no information on vitamin D plasma levels in our patients was  
10 available. However we believe this does not pose any problem since  
11 patients were not institutionalized and in Spain the exposure to sunlight is  
12 sufficient to ensure adequate levels of vitamin D. Furthermore, almost 90%  
13 of women aged 65 or older take supplements of calcium plus vitamin D.<sup>22</sup>  
14

### 15 16 17 **Conclusions**

18  
19 Ever use of oral bisphosphonates was not associated with a decreased risk  
20 of hip fracture in women aged 65 or older as compared to never use. No  
21 association between hip fracture risk and cumulative duration of  
22 bisphosphonate treatment was observed. However, when treatment  
23 duration is analysed as time since first prescription, a statistically significant  
24 increased risk for hip fracture was observed in patients exposed to  
25 bisphosphonates over 3 years.  
26  
27  
28

### 29 30 31 **Acknowledgements**

32  
33 The authors would like to thank the collaboration of general practitioners  
34 contributing to BIFAP.  
35  
36

### 37 38 39 **Disclaimer:**

40  
41 The Spanish Agency of Medicines and Medical Devices (AEMPS) provided the  
42 crude data from BIFAP to the researchers according to an agreement with  
43 the Health Department of Navarre Government but did not take part in the  
44 design or in the study development. Authors are fully responsible for the  
45 analysis, results and opinions appearing in the paper and do not represent  
46 the position of the AEMPS. The views expressed are those of the authors  
47 only and do not represent necessarily the position of their respective  
48 institutions.  
49  
50

### 51 52 53 **Footnotes**

- 54  
55  
56 • Contributors JE, AA, JG and AL were responsible for developing of  
57 study concept and design, data validation and interpretation of the  
58  
59  
60

1  
2  
3 results. AA performed the statistical analyses. JE drafted the  
4 manuscript. All authors have been involved in revising and  
5 elaborating it critically in the intellectual context.

- 6 • Funding: The present study is funded by the Spanish Ministry of  
7 Health, grant SAS/2481/2009 No TRA-071
- 8 • Competing interests: None.
- 9 • Ethics approval: Navarre Research Ethics Board, Pamplona, Spain.
- 10 • Data sharing statement: There are no additional data sharing to other  
11 parties.

## 12 13 14 15 16 17 18 19 20 21 22 23 24 25 26 27 28 29 30 31 32 33 34 35 36 37 38 39 40 41 42 43 44 45 46 47 48 49 50 51 52 53 54 55 56 57 58 59 60

### References

<sup>1</sup> Black DM, Cummings SR, Karpf DB, et al. Randomised trial of effect of alendronate on risk fracture in women with existing vertebral fractures. *Lancet* 1996;348:1535-41.

<sup>2</sup> Cummings SR, Black DM, Thompson D, et al. Effect of alendronate on risk of fracture in women with low bone density but without vertebral fractures. Results from the fracture intervention trial. *JAMA* 1998;280:2077-82.

<sup>3</sup> Liberman UA, Weiss SR, Broll J, et al. Effects of oral alendronate on bone mineral density and the incidence of fractures in postmenopausal osteoporosis. *N Engl J Med* 1995;333:1437-43

<sup>4</sup> Bone HG, Downs RW, Tucci JR, et al. Dose-response relationships for alendronate treatment in osteoporotic elderly women. *J Clin Endocrinol Metab* 1997;82:265-274.

<sup>5</sup> Reginster JY, Minne HW, Sorensen OH, et al. Vertebral Efficacy with Risedronate Therapy (VERT) Study Group. Randomized trial of the effects of risedronate on vertebral fractures in women with established postmenopausal osteoporosis. *Osteoporos Int* 2000;11:83-91.

<sup>6</sup> Harris ST, Watts NB, Genant HK, et al. Effects of risedronate treatment on vertebral and non vertebral fractures in women with postmenopausal osteoporosis: a randomized controlled trial. *JAMA* 1999;282:1344-52.

<sup>7</sup> McClung MR, Geusens P, Miller PD, et al. Effect of risedronate on the risk of hip fracture in elderly women. *N Engl J Med* 2001;344:333-40.

<sup>8</sup> Chesnut CH, Skag A, Christiansen C, et al. Effects of oral ibandronate administered daily or intermittently on fracture risk in postmenopausal osteoporosis. *J Bone Miner Res.* 2004;19(8):1241-9.

<sup>9</sup> Erviti J. Bisphosphonates: do they prevent or cause bone fractures? *Drug & Therapeutics Bulletin of Navarre (Spain)* 2009;17(5):65-75.

<sup>10</sup> Therapeutics Initiative. A systematic review of the efficacy of bisphosphonates. *Therapeutics Letter* 2011 Sept-Oct 83:1-2.

<sup>11</sup> Black DM, Schwartz AV, Ensrud KE, et al. Effects of Continuing or Stopping Alendronate After 5 Years of Treatment. The Fracture Intervention Trial Long-term Extension (FLEX): A Randomized Trial *JAMA.* 2006;296:2927-2938.

<sup>12</sup> Erviti J and Gorricho J. Use of alendronate after 5 years of treatment (letter). *JAMA* 2007;297(18):1979-1981.

1  
2  
3  
4  
5  
6  
7  
8  
9  
10  
11  
12  
13  
14  
15  
16  
17  
18  
19  
20  
21  
22  
23  
24  
25  
26  
27  
28  
29  
30  
31  
32  
33  
34  
35  
36  
37  
38  
39  
40  
41  
42  
43  
44  
45  
46  
47  
48  
49  
50  
51  
52  
53  
54  
55  
56  
57  
58  
59  
60

<sup>13</sup> CHMP assessment report on bisphosphonates and osteonecrosis of the jaw. EMEA/CHMP/291125/2009 (last access 02/08/2012)

<sup>14</sup> FDA Drug Safety Communication: Ongoing safety review of oral bisphosphonates and atypical subtrochanteric femur fractures. Available at <http://www.fda.gov/NewsEvents/Newsroom/PressAnnouncements/2010/ucm229171.htm> (last access 02/08/2012)

<sup>15</sup> Abrahamsen B, Eiken P, and Eastell R. Subtrochanteric and diaphyseal femur fractures in patients treated with alendronate: a register-based national cohort study. *JBMR*, doi: 10.1359/JBMR.081247.

<sup>16</sup> Abrahamsen B, Eiken P, and Eastell R. Cumulative Alendronate Dose and the Long-Term Absolute Risk of Subtrochanteric and Diaphyseal Femur Fractures: A Register-Based National Cohort Analysis *J Clin Endocrin Metab*, doi:10.1210/jc.2010-1571

<sup>17</sup> Salvador JC, Moreno D, Sonogo LA, et al. El Proyecto BIFAP: Base de datos para la Investigación. *Aten Primaria* 2002; 30: 655-661.

<sup>18</sup> Agencia Española de Medicamentos y Productos Sanitarios. Proyecto BIFAP <http://www.bifap.org/summary.php>

<sup>19</sup> Whitaker M, Guo J, Kehoe T, et al. Bisphosphonates for osteoporosis. Where do we go from here? *N Engl J Med* 2012; May 9, 2012 (10.1056/NEJMp1202619)

<sup>20</sup> Vlad SC, Zhu Y, Niu J, et al. Bisphosphonate use may be a risk factor for osteonecrosis at any site: a self-controlled case series analysis [abstract]. 27th ICPE: International Conference on Pharmacoepidemiology & Therapeutic Risk Management. Chicago, 2011;[274]

<sup>21</sup> Odvina CV, Zerwekh JE, Rao DS, et al. Severely suppressed bone turnover: a potential complication of alendronate therapy. *J Clin Endocrinol Metab* 2005;90:1294-1301.

<sup>22</sup> Javier Garjón. Calcium supplements: Are we doing it right? *DTB Navarre* 2012;20(3):1-12

Table 1. Characteristics of cases and controls

|                                           | Cases      | Controls   | P-value* |
|-------------------------------------------|------------|------------|----------|
| N                                         | 2009       | 10045      |          |
| Age, years                                | 82.4 (6.6) | 82.4 (6.6) | 1.00     |
| Smoking                                   |            |            | 0.001    |
| Non-current smoker, %                     | 69.5       | 73.4       |          |
| Current smoker, %                         | 2.7        | 2.0        |          |
| Not recorded, %                           | 27.8       | 24.6       |          |
| Alcoholism, %                             | 0.4        | 0.2        | 0.30     |
| Body mass index, kg/m <sup>2</sup>        | 27.2 (5.0) | 29.0 (5.0) | <0.0001  |
| <20 kg/m <sup>2</sup> , %                 | 2.7        | 1.0        | <0.0001  |
| 20-<25 kg/m <sup>2</sup> , %              | 17.6       | 12.2       |          |
| 25-<30 kg/m <sup>2</sup> , %              | 25.5       | 28.9       |          |
| >=30 kg/m <sup>2</sup> , %                | 19.8       | 30.8       |          |
| Not recorded, %                           | 34.4       | 27.1       |          |
|                                           |            |            |          |
| <b>Comorbidities</b>                      |            |            |          |
| Previous fracture, %                      | 17.2       | 10.1       | <0.0001  |
| Kidney disease, %                         | 4.9        | 3.6        | 0.006    |
| Malabsorption, %                          | 2.3        | 2.1        | 0.54     |
| Stroke, %                                 | 10.7       | 6.2        | <0.0001  |
| Dementia, %                               | 14.6       | 6.2        | <0.0001  |
| Rheumatoid arthritis, %                   | 2.3        | 1.3        | 0.0006   |
| Diabetes, %                               | 22.2       | 17.7       | <0.0001  |
| Epilepsy, %                               | 1.4        | 0.9        | 0.03     |
| Parkinson disease, %                      | 4.9        | 1.9        | <0.0001  |
| Thyroid disease, %                        | 10.2       | 10.8       | 0.47     |
|                                           |            |            |          |
| <b>Use of medication</b>                  |            |            |          |
| PPI or H <sub>2</sub> receptor blocker, % | 38.2       | 34.0       | 0.0004   |
| Anxiolytic, %                             | 29.1       | 24.8       | <0.0001  |
| Antidepressants, %                        | 22.6       | 13.8       | <0.0001  |
| Antihypertensives, %                      | 56.8       | 61.6       | <0.0001  |
| Corticosteroids, %                        | 8.0        | 7.4        | 0.33     |
| Sedatives, %                              | 11.8       | 9.3        | 0.0006   |
| Raloxifene, %                             | 0.3        | 0.5        | 0.14     |
| Hormone replacement therapy, %            | 0.0        | 0.0        | 1.00     |
| Thiazolidinedione, %                      | 0.3        | 0.2        | 0.43     |

Values correspond to percentage or means (standard deviation). P-values calculated from chi-square test for categorical values and Student's t test for continuous variables.

1  
2  
3  
4  
5  
6  
7  
8  
9  
10  
11  
12  
13  
14  
15  
16  
17  
18  
19  
20  
21  
22  
23  
24  
25  
26  
27  
28  
29  
30  
31  
32  
33  
34  
35  
36  
37  
38  
39  
40  
41  
42  
43  
44  
45  
46  
47  
48  
49  
50  
51  
52  
53  
54  
55  
56  
57  
58  
59  
60

For peer review only

**Table 2. Association of any bisphosphonate use with the risk of hip fracture.**

|                         | Cases       | Controls    | Average cumulative duration (days) | Time since first BP prescription (days) | Model 1          | Model 2          |
|-------------------------|-------------|-------------|------------------------------------|-----------------------------------------|------------------|------------------|
|                         | n (%)       | n (%)       | Mean (SD)                          | Mean (SD)                               | OR (95% CI)      | OR (95% CI)      |
| Use                     |             |             |                                    |                                         |                  |                  |
| No use                  | 1726 (85.9) | 8838 (88.0) | -                                  | -                                       | 1 (ref.)         | 1 (ref.)         |
| Ever use                | 283 (14.1)  | 1207 (12.0) | 600 (556)                          | 968 (622)                               | 1.21 (1.05-1.39) | 1.09 (0.94-1.27) |
| Timing                  |             |             |                                    |                                         |                  |                  |
| No use                  | 1726 (85.9) | 8838 (88.0) | -                                  | -                                       | 1 (ref.)         | 1 (ref.)         |
| Past use                | 111 (5.5)   | 347 (3.5)   | 315(415)                           | 1164 (601)                              | 1.63 (1.31-2.04) | 1.50 (1.19-1.89) |
| Recent use              | 43 (2.1)    | 127 (1.3)   | 515(521)                           | 774 (599)                               | 1.74 (1.22-2.47) | 1.34 (0.92-1.95) |
| Current use             | 129 (6.4)   | 733 (7.3)   | 769(563)                           | 903 (612)                               | 0.90 (0.74-1.10) | 0.84 (0.68-1.03) |
| p for trend             |             |             |                                    |                                         | 0.54             | 0.53             |
| Duration                |             |             |                                    |                                         |                  |                  |
| No use ( $\leq 30$ d)   | 1726 (85.9) | 8838 (88.0) | -                                  | -                                       | 1 (ref.)         | 1 (ref.)         |
| >30 d $\leq 1$ yr       | 139 (6.9)   | 533 (5.3)   | 147 (106)                          | 687 (590)                               | 1.34 (1.10-1.63) | 1.20 (0.97-1.47) |
| >1 yr - $\leq 3$ yr     | 92 (4.6)    | 458 (4.6)   | 684 (211)                          | 956 (419)                               | 1.03 (0.82-1.30) | 0.94 (0.74-1.20) |
| >3 yr                   | 52 (2.6)    | 216 (2.2)   | 1566 (375)                         | 1698 (437)                              | 1.25 (0.91-1.70) | 1.15 (0.82-1.60) |
| p for trend             |             |             |                                    |                                         | 0.16*            | 0.63*            |
| Time since first BP use |             |             |                                    |                                         |                  |                  |
| No use ( $\leq 30$ d)   | 1726 (85.9) | 8838 (88.0) | -                                  | -                                       | 1 (ref.)         | 1 (ref.)         |
| >30 d $\leq 1$ yr       | 41 (2.0)    | 222 (2.2)   | 140 (99)                           | 194 (103)                               | 0.95 (0.67-1.33) | 0.85 (0.60-1.21) |
| >1 yr - $\leq 3$ yr     | 120 (6.0)   | 546 (5.4)   | 454 (299)                          | 727 (209)                               | 1.13 (0.92-1.38) | 1.02 (0.82-1.26) |
| >3 yr                   | 122 (6.1)   | 439 (4.4)   | 990 (660)                          | 1618 (445)                              | 1.44 (1.17-1.78) | 1.32 (1.05-1.65) |
| p for trend**           |             |             |                                    |                                         | 0.0008           | 0.03             |

Model 1: Conditional logistic regression model; Model 2: Conditional logistic regression model adjusted for smoking, BMI, alcoholism, previous fracture, kidney disease, malabsorption, stroke, dementia, rheumatoid arthritis, diabetes, epilepsy, Parkinson disease, and thyroid disease, PPI (no use,  $\leq 1$  yr,  $>1$  yr), anxiolytics, sedatives, antidepressants, antihypertensives, oral corticosteroids (no use,  $\leq 1$  yr,  $>1$  yr), raloxifene, hormone replacement therapy, and thiazolidinediones

\* Modeled as the median duration of use in each category; \*\* Modeled as time in days since first bisphosphonate prescription (0 for no users)

**Table 3. Risk of hip fracture by time since first prescription for bisphosphonates**

|                         | Cases      | Controls   | Average cumulative duration (days) | Time since first BP prescription (days) | Model 1          | Model 2          |
|-------------------------|------------|------------|------------------------------------|-----------------------------------------|------------------|------------------|
|                         | n (%)      | n (%)      | Mean (SD)                          | Mean (SD)                               | OR (95% CI)      | OR (95% CI)      |
| Time since first BP use |            |            |                                    |                                         |                  |                  |
| >30 d ≤1 yr             | 41 (14.5)  | 222 (18.4) | 157 (133)                          | 194 (103)                               | 1 (ref)          | 1 (ref)          |
| >1 yr - ≤3 yr           | 120 (42.4) | 546 (45.2) | 535 (451)                          | 727 (209)                               | 1.23 (0.68-2.23) | 1.49 (0.71-3.13) |
| >3 yr                   | 122 (43.1) | 439 (36.4) | 1138 (873)                         | 1618 (445)                              | 1.79 (0.94-3.40) | 2.21 (0.96-5.09) |
| p for trend*            |            |            |                                    |                                         | 0.03             | 0.03             |

Model 1: Conditional logistic regression model

Model 2: Conditional logistic regression model adjusted for smoking, BMI, alcoholism, previous fracture, kidney disease, malabsorption, stroke, dementia, rheumatoid arthritis, diabetes, epilepsy, Parkinson disease, and thyroid disease, PPI (no use, ≤1 yr, >1 yr), anxiolytics, sedatives, antidepressants, antihypertensives, oral corticosteroids (no use, ≤1 yr, >1 yr), raloxifene, hormone replacement therapy, and thiazolidinediones

\* Modeled as time in days since first bisphosphonate prescription

**Table 4. Association of ever use of individual bisphosphonates with the risk of hip fracture.**

|             | Cases       | Controls    | Average duration | Time since first prescription | Model 1          | Model 2          |
|-------------|-------------|-------------|------------------|-------------------------------|------------------|------------------|
|             | n (%)       | n (%)       | (days)           | (days)                        | OR (95% CI)      | OR (95% CI)      |
| Never use   | 1726 (85.9) | 8838 (88.0) | -                | -                             | 1 (ref.)         | 1 (ref.)         |
| Alendronate | 128 (6.4)   | 598 (6.0)   | 599 (566)        | 956 (603)                     | 1.10 (0.90-1.34) | 0.99 (0.81-1.22) |
| Risedronate | 95 (4.7)    | 438 (4.4)   | 508 (459)        | 822 (503)                     | 1.12 (0.89-1.41) | 1.02 (0.81-1.30) |
| Etidronate  | 19 (1.0)    | 63 (0.6)    | 818 (629)        | 1478 (746)                    | 1.55 (0.92-2.59) | 1.56 (0.91-2.65) |
| Ibandronate | 7 (0.4)     | 9 (0.1)     | 161 (137)        | 239 (151)                     | 4.18 (1.55-11.2) | 3.67 (1.31-10.3) |
| Switcher    | 34 (1.7)    | 99 (1.0)    | 898 (676)        | 1397 (714)                    | 1.80 (1.21-2.68) | 1.63 (1.07-2.47) |

Model 1: Conditional logistic regression model

Model 2: Conditional logistic regression model adjusted for smoking, BMI, and alcoholism, previous fracture, kidney disease, malabsorption, stroke, dementia, rheumatoid arthritis, diabetes, epilepsy, Parkinson disease, and thyroid disease, PPI (no use, <=1 yr, >1 yr), anxiolytics, sedatives, antidepressants, antihypertensives, oral corticosteroids (no use, <=1 yr, >1 yr), raloxifene, hormone replacement therapy, and thiazolidinediones



**TITLE****ORAL BISPHOSPHONATES MAY NOT DECREASE HIP FRACTURE RISK IN ELDERLY SPANISH WOMEN****AUTHORS**

Juan Erviti, Álvaro Alonso<sup>1,2</sup>, Javier Gorricho, Antonio López

Drug Prescribing Service, Navarre Regional Health Service, Pamplona, Navarre, Spain;

<sup>1</sup>School of Public Health, University of Minnesota, Minneapolis, Minnesota, United States;

<sup>2</sup>School of Medicine, University of Navarre, Pamplona, Navarre, Spain.

**ARTICLE SUMMARY****Article Focus**

. The hypothesis of this study is that oral bisphosphonates may not be effective in reducing hip fracture risk in clinical practice in the long-term use.

**Key messages**

. Ever use of oral bisphosphonates was not associated with a decreased risk of hip fracture in women aged 65 or older as compared to never use.

. No association between hip fracture risk and cumulative duration of bisphosphonate treatment was observed.

. When treatment duration is analysed as time since first prescription, a statistically significant increased risk for hip fracture was observed in patients exposed to bisphosphonates over 3 years.

**Strengths and limitations**

. The main strength of this study is that it sheds light on the effects of oral bisphosphonates on hip fracture risk in clinical practice in a Mediterranean population.

. One of the main limitations is the relatively short follow-up period.

**ABSTRACT**

**Objectives**

To evaluate the association between long-term use of bisphosphonates and the risk of hip fracture compared to never use among women aged 65 years or older.

**Design**

Case-control study nested in a cohort.

**Setting**

General practice research database operated by the Spanish Medicines Agency.

**Participants:**

Cases of hip fracture were defined as women aged 65 years or older with a validated first diagnosis of hip fracture between 2005 and 2008. Five controls free of hip fracture were matched on age and calendar year with each case.

**Interventions**

Information on bisphosphonate use, hip fractures, comedication, and comorbidities was collected.

**Primary outcomes**

Hip fracture risk comparing bisphosphonate users vs never users

**Secondary outcomes**

Hip fracture risk comparing bisphosphonate users vs never users by individual drugs

**Results**

The study included 2,009 incident hip fractures and 10,045 matched controls. Hip fracture risk did not differ between bisphosphonate users and never users, adjusted OR = 1.09 (95% CI, 0.94-1.27). No association between hip fracture risk and cumulative duration of bisphosphonate treatment was observed. However, when treatment duration is analysed as time since first prescription, hip fracture risk of the different subgroups compared to never users obtained were as follows: <1 year, OR 0.85 (95%CI, 0.60-1.21); 1 to <3 years, OR 1.02 (95%CI 0.82-1.26); ≥ 3 years, OR 1.32 (95%CI 1.05-1.65) (p for trend = 0.03).

**Conclusions**

1  
2  
3  
4  
5  
6 Ever use of oral bisphosphonates was not associated with a decreased risk  
7 of hip fracture in women aged 65 or older as compared to never use. No  
8 association between hip fracture risk and cumulative duration of  
9 bisphosphonate treatment was observed. However, when treatment  
10 duration is analysed as time since first prescription, a statistically significant  
11 increased risk for hip fracture was observed in patients exposed to  
12 bisphosphonates over 3 years.  
13

#### 14 **Trial Registration**

15  
16 Spanish Ministry of Health. TRA-071  
17  
18  
19

## 20 **INTRODUCTION**

### 21 **Background**

22  
23  
24  
25 When bisphosphonates came onto the market, they had demonstrated  
26 efficacy in the improvement of bone density, but there was no evidence for  
27 reduction of hip fractures. They were introduced on the theoretical  
28 assumption that the increase in bone density implied strengthening of the  
29 bone structure, and therefore a reduction in the risk of fracture.  
30

31  
32 In most pivotal trials comparing the effects of alendronate,<sup>1-4</sup> risedronate,<sup>5-7</sup>  
33 or ibandronate<sup>8</sup> versus placebo hip fractures were considered as secondary  
34 endpoints and outcomes did not show any clear potential benefit in  
35 decreasing hip fracture risk. Several meta-analyses of alendronate and  
36 risedronate have been carried out and a statistically significant benefit of  
37 these drugs over placebo is claimed reported. However, the clinical  
38 significance of the findings is debateable and methodology biases are also  
39 present in the reviews.<sup>9</sup> A recent meta-analysis obtained similar results.  
40 However, trials' quality assessment was carried out and revealed an unclear  
41 or high risk of bias in approximately 75% of the trials. This means that the  
42 small significant reduction in hip fracture may not be real, or at best, is an  
43 exaggeration of the real benefit.<sup>10</sup>  
44

45  
46 In 2006 the longest ever clinical trial evaluating the effects of  
47 bisphosphonates was published. After 5 years under alendronate, women  
48 were randomized to either continue taking the drug or receive placebo for  
49 another five years. Discontinuation of alendronate for up to five years did  
50 not increase fracture risk change numerically or statistically either nonspine  
51 or hip fracture incidence.<sup>11</sup> However no comparison between alendronate  
52 use versus no use was established. This prompted us to carry out the  
53 present study.<sup>12</sup>  
54  
55  
56  
57  
58  
59  
60

1  
2  
3  
4  
5  
6 The long-term use of bisphosphonates has been associated with deleterious  
7 effects on bone structure such as osteonecrosis of the jaw, atypical  
8 fractures (subtrochanteric and diaphyseal), and bone pain that prompted  
9 several safety communications issued by both the FDA and EMA.<sup>13,14</sup>  
10

11 In 2008 a cohort study in Danish women with no previous hip fracture was  
12 published. The incidence of hip fractures increased in the group treated with  
13 alendronate by 50% in relative terms and by 6 cases per 1,000 women-  
14 years in absolute terms<sup>15</sup>. Updated information from this Danish cohort was  
15 published in 2010 and the increased incidence of hip fractures in women  
16 taking alendronate was confirmed.<sup>16</sup>  
17  
18  
19

## 20 **Objective**

21 The aim of this study is to evaluate the association between long-term use  
22 of bisphosphonates and the risk of hip fracture compared to never use  
23 among women aged 65 years or older.  
24  
25  
26  
27

## 28 **METHODS**

### 29 **Study design and setting**

30 We carried out a case-control study nested in a cohort in Spain using the  
31 information from BIFAP (*Base de Datos para la Investigación*  
32 *Farmacoepidemiológica en Atención Primaria*, Database for  
33 Pharmacoepidemiologic Research in Primary Care). This is a longitudinal  
34 population-based database kept by the Spanish Agency for Medicines and  
35 Medical Devices that collates, from 2001 onwards, the computerized  
36 medical records of more than 1,800 physicians throughout Spain. It includes  
37 anonymized information on over 3.2 million patients, totalling over 13.7  
38 million person-years of follow up.<sup>17,18</sup>  
39  
40  
41

42 This project was approved by the Navarre Research Ethics Board,  
43 Pamplona, Spain. All data were anonymized and no written consent was  
44 necessary for this type of study according to the Spanish regulations (law  
45 41/2002, article 16).  
46  
47  
48

### 49 **Participants**

50 Cases were defined as women aged 65 years or older with a first diagnosis  
51 of hip fracture, using the ICPC-1 codes, recorded between 01/01/2005 and  
52 31/12/2008, and with at least 1 year of follow-up in BIFAP before the event  
53 date. The date of hospitalization served as the index date. All hip fracture  
54  
55  
56  
57  
58  
59  
60

cases were double-checked and validated by both BIFAP and the research team. We excluded women with any history of cancer, Paget disease, prevalent hip fracture and fractures resulting from trauma or motor vehicle collisions. For each case, 5 controls with no history of hip fracture by the time of the index date of their corresponding case were selected, matched by same age and calendar year of enrolment in BIFAP.

### **Medication use and other covariates**

Use of bisphosphonates before the index date was obtained from the computerized database. Duration of bisphosphonate exposure was evaluated by examining prescriptions for oral alendronate, risedronate, ibandronate or etidronate from the beginning of therapy to the index date or the corresponding date among controls (ATC codes: alendronate, M05BA04; alendronate plus vitamin D, M05BB; risedronate, M05BA07 and ibandronate, M05BA06).

Individuals were classified as ever vs never users. Ever users were also divided into *current users* (if most recent prescription lasted through index date or ended in the month before it), *recent users* (if most recent prescription ended between 1 and 6 months before index date) and *past users* (if most recent prescription ended more than 6 months before index date).

In order to assess the effects of treatment length on the outcomes four different subgroups were considered based on cumulative duration of actual treatment, namely 30 days or less; >30 days to ≤1 year; >1 to ≤3 years and over 3 years. The effects of time of bisphosphonate exposure on hip fracture risk were also analyzed. Exposure was measured as the time (in days) since the first prescription.

~~In order to assess the effects of treatment length on the outcomes two criteria were used: a) Cumulative duration of actual treatment; and b) Time since first prescription. In both, three different subgroups were considered, namely <1 year; 1 to 3 years and over 3 years.~~

Information on comorbidities (ICPC-1 codes) and use of other medications (ATC codes) was obtained. Patients were considered exposed if the most recent prescription lasted through index date or ended in the month before it. Other variables such as weight (kg), height (cm), body mass index (kg/m<sup>2</sup>) and smoking status (yes/no/past smoker) were obtained as well.

### **Statistical methods**

Between 2005 and 2008 we expected to find some 2,000 cases and 10,000 controls in our database. This would provide statistical power >90% to detect a change >20% in the risk of having hip fracture associated to bisphosphonate use with an alpha risk of 5% and a prevalence of exposure of 20%.

Formatted: Font: 11 pt

Formatted: Font: 11 pt

Formatted: Font: 11 pt

1  
2  
3  
4  
5  
6  
7 We used conditional logistic regression to estimate the odds ratios (ORs)  
8 and 95 percent confidence intervals (CIs) for the association between  
9 bisphosphonate exposure and hip fractures. Bisphosphonate use was  
10 categorized as ever vs never. In separate analyses, current, recent, or past  
11 use was also evaluated. Treatment duration was assessed as well and  
12 results were tested to identify a trend. The level of significance was  
13 established at  $p = 0.05$ . In the duration analysis adjusted for exposure,  
14 never users was considered as the reference group. The results were also  
15 compared to bisphosphonate users for less than one year as a sensitivity  
16 analysis in case of selection bias.

17  
18 An initial "model 1" adjusted only for matching variables. A second "model  
19 2" adjusted additionally for smoking, BMI, alcoholism, previous fracture,  
20 kidney disease, malabsorption, stroke, dementia, rheumatoid arthritis,  
21 diabetes, epilepsy, Parkinson disease, thyroid disease, PPI (no use,  $\leq 1$  yr,  
22  $> 1$  yr), anxiolytics, sedatives, antidepressants, antihypertensives, oral  
23 corticosteroids (no use,  $\leq 1$  yr,  $> 1$  yr), raloxifene, hormone replacement  
24 therapy, and thiazolidinediones.

## 25 26 **RESULTS**

### 27 ***Participants***

28  
29 Between 2005 and 2008, 3,181 potentially eligible cases were registered.  
30 Out of them we validated 2,069 hip fractures and 45 atypical fractures (31  
31 subtrochanteric and 14 shaft fractures). Of the remainder 1,067 records  
32 were classified as "no case", 718 "other diagnoses" and 349 "lacking  
33 information". Sixty cases were excluded due to lack of matching controls. A  
34 total of 2,009 cases were obtained and 10,045 matching controls were  
35 selected (figure 1).  
36

37  
38 The average age of cases was  $82.4 \pm 6.6$  years. In general terms co-  
39 morbidities and drug use was more prevalent in cases while smoking status  
40 and BMI were similar between cases and controls (table 1).  
41

### 42 ***Outcome data***

43  
44 Hip fractures were more frequent among bisphosphonate users, 283  
45 (14.1%) compared to never users, 1207 (12.0%). Results according to  
46 timing, duration, and bisphosphonate exposure are described in table 2.  
47

### 48 ***Main results***

49  
50 Ever users of bisphosphonates had a higher risk of hip fracture compared to  
51 never users (unadjusted OR = 1.21, 95%CI, 1.05-1.39). After adjusting for  
52 co-medication and pathologies no significant differences were found  
53 between bisphosphonate users and never users, OR = 1.09 (95%CI, 0.94-  
54 1.27).  
55

1  
2  
3  
4  
5  
6  
7  
8 No association between hip fracture risk and cumulative duration of  
9 bisphosphonate treatment was observed: <1 year, OR 1.20 (95% CI, 0.97-  
10 1.47); 1 to <3 years, OR 0.94 (95% CI, 0.74-1.20); ≥ 3 years, OR 1.15  
11 (95%CI, 0.82-1.60) (p for trend = 0.63). However, when treatment  
12 duration is analysed as time since first prescription, hip fracture risk of the  
13 different subgroups compared to never users obtained were as follows: <1  
14 year, OR 0.85 (95%CI, 0.60-1.21); 1 to <3 years, OR 1.02 (95%CI 0.82-  
15 1.26); ≥ 3 years, OR 1.32 (95%CI 1.05-1.65) (p for trend = 0.03). If  
16 women exposed to bisphosphonates during less than one year was  
17 considered as the reference group, hip fracture risk observed in the  
18 different subgroups were: 1 to <3 years, OR 1.56 (95%CI 0.73-3.31); ≥ 3  
19 years, OR 2.31 (95%CI 1.00-5.36) (p for trend = 0.03) (tables 2 and 3).

20  
21  
22 No significant trend was observed for timing (past, recent and current use).  
23 Past use of bisphosphonates was associated with a statistically significant  
24 increase in hip fracture risk (OR = 1.50, 95%CI 1.19-1.89) while current or  
25 recent use was not (table 2).

26  
27 No protective effect on hip fracture risk was observed when the results were  
28 analysed by individual drugs. On the contrary, a statistically significant  
29 increased risk was found for ibandronate users (OR = 3.67, 95%CI 1.31-  
30 10.3) and for switchers as well (OR = 1.63, 95%CI 1.07-2.47) (table 4).

## 31 32 33 **DISCUSSION**

### 34 **Key results**

35  
36 According to our findings oral bisphosphonates may not decrease hip  
37 fracture risk in elderly women. In order to reduce selection bias, results  
38 were adjusted for co-pathologies and medication. However, residual  
39 selection bias may still occur. In a cohort study in Danish women with a  
40 previous fracture but with no previous hip fracture, the risk of hip fracture  
41 was increased in the group treated with alendronate.<sup>15,16</sup> This study was  
42 performed on alendronate only whereas in our study all oral  
43 bisphosphonates were included. Our findings are in line with the Danish  
44 study in which a higher hip fracture risk was observed.

45  
46 A recent meta-analysis of clinical trials assessed the effects of  
47 bisphosphonates on hip and wrist fracture risk. Similar results to previous  
48 meta-analyses were observed, namely a 1% absolute reduction of hip  
49 fracture risk in bisphosphonate users. What is new about this publication is  
50 that trials' quality assessment was carried out and revealed an unclear or  
51 high risk of bias in approximately 75% of the trials. This means that the  
52 small significant reduction in hip fracture may not be real, or at best, is an  
53  
54  
55

1  
2  
3  
4  
5  
6 exaggeration of the real benefit<sup>10</sup>Error! Bookmark not defined. which is in line with  
7 our findings.  
8  
9

10  
11 We evaluated the effects of treatment length and the results by individual  
12 drugs as secondary outcomes. No association between hip fracture risk and  
13 cumulative duration of bisphosphonate treatment was observed. However,  
14 fracture risk increased with longer exposure to bisphosphonates. A  
15 statistically significant trend for increased risk of hip fracture was observed  
16 among bisphosphonate users irrespective of whether the reference group  
17 was never users or women under treatment for less than one year. Results  
18 were tested against the two different reference groups because of the  
19 possible selection bias in any of them. The results were consistent in both  
20 analyses.  
21

22 According to the results by individual drugs, no protective effect was  
23 observed. On the contrary, a statistically significant increased risk was  
24 found for ibandronate users and for switchers as well. Probably ibandronate  
25 results in our study are conditioned by a small sample size.  
26

27 No significant trend was observed for timing (past, recent and current use).  
28 Past users showed a statistically significant higher fracture risk when  
29 compared to never users while current or recent users did not. This could be  
30 interpreted as if bisphosphonates provided a protective effect on hip  
31 fracture risk that disappears after drug withdrawal. However there are some  
32 other possible explanations for this. First, treatment withdrawal could be  
33 more frequent in patients suffering from drug adverse reactions, in those  
34 who did not tolerate treatment, or had a poorer clinical status. All these  
35 patients have a higher fracture risk and selection bias is another possible  
36 explanation for a higher fracture risk in patients who stopped taking  
37 bisphosphonates.  
38  
39

40 Second, bisphosphonates accumulate in bone structure and past users are  
41 exposed to the drug effects for many years after withdrawal. Given the  
42 relatively short follow-up period in this study, all patients are exposed to the  
43 drug effects irrespective of whether they are past, recent or current users.  
44 Thereby interpreting results according to these subgroups may be  
45 meaningless. The FLEX trial shows that there is no difference in hip fracture  
46 risk between past and current users. Past users had been under treatment  
47 for 5 years and had stopped taking the drug 5 years before assessment.  
48 This trial supports that alendronate accumulates in bone and past users are  
49 exposed to the drug effects for many years after withdrawal. Thereby it  
50 makes sense to consider exposure to bisphosphonates in the results  
51 analysis. Also we must take into account that in the FLEX trial there is no  
52 selection bias due to randomization, and consequently its findings support  
53 that the higher risk observed in the past users in our study may be related  
54  
55  
56  
57  
58  
59  
60



1  
2  
3  
4  
5  
6 to a selection bias and a longer exposure to bisphosphonates in this  
7 subgroup as well.  
8

9  
10  
11 A recent article published by FDA researchers analysed the results of three  
12 long-term extension trials on alendronate, risedronate and zoledronic acid.  
13 Pooled data pertaining to patients who received continuous bisphosphonate  
14 treatment for 6 or more years resulted in fracture rates ranging from 9.3 to  
15 10.6%, whereas the rate for patients switched to placebo was 8.0 to 8.8%.  
16 These data raise the question on whether long-term use of bisphosphonates  
17 is beneficial for patients.<sup>19</sup>  
18

19 With long-term use it is widely accepted that bisphosphonates may cause  
20 osteonecrosis of the jaw and atypical (subtrochanteric and diaphyseal)  
21 fractures as well. Recently, a self-controlled case series analysis showed  
22 that bisphosphonate use was associated with osteonecrosis at any site.<sup>20</sup>  
23 Deleterious effects on bone structure have been observed with  
24 bisphosphonates and denosumab as well but not with other osteoporosis  
25 drugs. Both type of drugs inhibit bone turnover and thereby bone strength  
26 may be weaker as a result of treatment. Besides bisphosphonates prolong  
27 secondary mineralization leading to increased bone density but decreased  
28 bone toughness due to a higher mineral content (brittle bones).<sup>21</sup> Since  
29 there is biological rationale to explain the harmful effects of  
30 bisphosphonates on bone, more long-term studies are needed to test our  
31 findings.  
32  
33

Formatted: Superscript

### 34 35 36 **Limitations**

37 One of the main limitations in our study is the relatively short follow-up  
38 period. Besides, we relied on prescription data to determine duration of  
39 bisphosphonate exposure. It is sensible to think that real exposure will likely  
40 be lower than registered. In the clinical records included in the BIFAP  
41 database, X-ray images are not available which might occasionally lead to  
42 misclassification of cases. However we believe this may not be a relevant  
43 limitation yet hip fracture cases are described in detail in the surgical  
44 procedures.  
45  
46

47 Another aspect to be pointed out is that ibandronate was marketed in Spain  
48 in January 2007 and in our study we included incident cases of hip fracture  
49 that occurred between 2005 and 2008. Thereby the exposure of both cases  
50 and controls to ibandronate is rather short-term.  
51

52 Confounding by indication is a possible bias of this study. Theoretically  
53 women in a poor baseline condition could be prescribed bisphosphonates to  
54 a greater extent when compared to women with a better health status. In  
55  
56

1  
2  
3  
4  
5  
6 order to minimize this bias, results were adjusted for previous fractures,  
7 comorbidities and use of other medications.  
8

9 Bone mineral density determination is not a standard test available in the  
10 public health system in Spain. Thereby information on BMD in clinical  
11 records was rather scarce. However, this test has a very poor fracture risk  
12 predictive value and its clinical relevance can be challenged. When it comes  
13 to adjusting crude data we used other bone-related variables instead such  
14 as prevalence of previous fractures.  
15

16 In our study no information on vitamin D plasma levels in our patients was  
17 available. However we believe this does not pose any problem since  
18 patients were not institutionalized and in Spain the exposure to sunlight is  
19 sufficient to ensure adequate levels of vitamin D. Furthermore, almost 90%  
20 of women aged 65 or older take supplements of calcium plus vitamin D.<sup>22</sup>  
21

Formatted: Superscript

## 22 23 24 **Conclusions**

25  
26 Ever use of oral bisphosphonates was not associated with a decreased risk  
27 of hip fracture in women aged 65 or older as compared to never use. No  
28 association between hip fracture risk and cumulative duration of  
29 bisphosphonate treatment was observed. However, when treatment  
30 duration is analysed as time since first prescription, a statistically significant  
31 increased risk for hip fracture was observed in patients exposed to  
32 bisphosphonates over 3 years.  
33

## 34 35 36 **Acknowledgements**

37  
38 The authors would like to thank the collaboration of general practitioners  
39 contributing to BIFAP.  
40

## 41 42 43 **Disclaimer:**

44  
45 The Spanish Agency of Medicines and Medical Devices (AEMPS) provided the  
46 crude data from BIFAP to the researchers according to an agreement with  
47 the Health Department of Navarre Government but did not take part in the  
48 design or in the study development. Authors are fully responsible for the  
49 analysis, results and opinions appearing in the paper and do not represent  
50 the position of the AEMPS. The views expressed are those of the authors  
51 only and do not represent necessarily the position of their respective  
52 institutions.  
53  
54  
55

## Footnotes

- Contributors JE, AA, JG and AL were responsible for developing of study concept and design, data validation and interpretation of the results. AA performed the statistical analyses. JE drafted the manuscript. All authors have been involved in revising and elaborating it critically in the intellectual context.
- Funding: The present study is funded by the Spanish Ministry of Health, grant SAS/2481/2009 No TRA-071
- Competing interests: None.
- Ethics approval: Navarre Research Ethics Board, Pamplona, Spain.
- Data sharing statement: There are no additional data sharing to other parties.

## References

- <sup>1</sup> Black DM, Cummings SR, Karpf DB, et al. Randomised trial of effect of alendronate on risk fracture in women with existing vertebral fractures. *Lancet* 1996;348:1535-41.
- <sup>2</sup> Cummings SR, Black DM, Thompson D, et al. Effect of alendronate on risk of fracture in women with low bone density but without vertebral fractures. Results from the fracture intervention trial. *JAMA* 1998;280:2077-82.
- <sup>3</sup> Liberman UA, Weiss SR, Broll J, et al. Effects of oral alendronate on bone mineral density and the incidence of fractures in postmenopausal osteoporosis. *N Engl J Med* 1995;333:1437-43
- <sup>4</sup> Bone HG, Downs RW, Tucci JR, et al. Dose-response relationships for alendronate treatment in osteoporotic elderly women. *J Clin Endocrinol Metab* 1997;82:265-274.
- <sup>5</sup> Reginster JY, Minne HW, Sorensen OH, et al. Vertebral Efficacy with Risedronate Therapy (VERT) Study Group. Randomized trial of the effects of risedronate on vertebral fractures in women with established postmenopausal osteoporosis. *Osteoporos Int* 2000;11:83-91.
- <sup>6</sup> Harris ST, Watts NB, Genent HK, et al. Effects of risedronate treatment on vertebral and non vertebral fractures in women with postmenopausal osteoporosis: a randomized controlled trial. *JAMA* 1999;282:1344-52.
- <sup>7</sup> McClung MR, Geusens P, Miller PD, et al. Effect of risedronate on the risk of hip fracture in elderly women. *N Engl J Med* 2001;344:333-40.
- <sup>8</sup> Chesnut CH, Skag A, Christiansen C, et al. Effects of oral ibandronate administered daily or intermittently on fracture risk in postmenopausal osteoporosis. *J Bone Miner Res*. 2004;19(8):1241-9.
- <sup>9</sup> Erviti J. Bisphosphonates: do they prevent or cause bone fractures? *Drug & Therapeutics Bulletin of Navarre (Spain)* 2009;17(5):65-75.
- <sup>10</sup> Therapeutics Initiative. A systematic review of the efficacy of bisphosphonates. *Therapeutics Letter* 2011 Sept-Oct 83:1-2.
- <sup>11</sup> Black DM, Schwartz AV, Ensrud KE, et al. Effects of Continuing or Stopping Alendronate After 5 Years of Treatment. The Fracture Intervention Trial Long-term Extension (FLEX): A Randomized Trial *JAMA*. 2006;296:2927-2938.

1  
2  
3  
4  
5  
6  
7  
8  
9  
10  
11  
12  
13  
14  
15  
16  
17  
18  
19  
20  
21  
22  
23  
24  
25  
26  
27  
28  
29  
30  
31  
32  
33  
34  
35  
36  
37  
38  
39  
40  
41  
42  
43  
44  
45  
46  
47  
48  
49  
50  
51  
52  
53  
54  
55  
56  
57  
58  
59  
60

<sup>12</sup> Erviti J and Gorricho J. Use of alendronate after 5 years of treatment (letter). JAMA 2007;297(18):1979-1981.

<sup>13</sup> CHMP assessment report on bisphosphonates and osteonecrosis of the jaw. EMEA/CHMP/291125/2009 (last access 02/08/2012)

<sup>14</sup> FDA Drug Safety Communication: Ongoing safety review of oral bisphosphonates and atypical subtrochanteric femur fractures. Available at <http://www.fda.gov/NewsEvents/Newsroom/PressAnnouncements/2010/ucm229171.htm> (last access 02/08/2012)

<sup>15</sup> Abrahamsen B, Eiken P, and Eastell R. Subtrochanteric and diaphyseal femur fractures in patients treated with alendronate: a register-based national cohort study. JBMR, doi:10.1359/JBMR.081247.

<sup>16</sup> Abrahamsen B, Eiken P, and Eastell R. Cumulative Alendronate Dose and the Long-Term Absolute Risk of Subtrochanteric and Diaphyseal Femur Fractures: A Register-Based National Cohort Analysis J Clin Endocrin Metab, doi:10.1210/jc.2010-1571

<sup>17</sup> Salvador JC, Moreno D, Sonogo LA, et al. El Proyecto BIFAP: Base de datos para la Investigación. *Aten Primaria* 2002; 30: 655-661.

<sup>18</sup> Agencia Española de Medicamentos y Productos Sanitarios. Proyecto BIFAP <http://www.bifap.org/summary.php>

<sup>19</sup> Whitaker M, Guo J, Kehoe T, et al. Bisphosphonates for osteoporosis. Where do we go from here? N Engl J Med 2012; May 9, 2012 (10.1056/NEJMp1202619)

<sup>20</sup> Vlad SC, Zhu Y, Niu J, et al. Bisphosphonate use may be a risk factor for osteonecrosis at any site: a self-controlled case series analysis [abstract]. 27th ICPE: International Conference on Pharmacoepidemiology & Therapeutic Risk Management. Chicago, 2011;[274]

<sup>21</sup> ~~Odvina CV, Zerwekh JE, Rao DS, et al. Severely suppressed bone turnover: a potential complication of alendronate therapy. J Clin Endocrinol Metab 2005;90:1294-1301.~~

<sup>22</sup> ~~Javier Garión. Calcium supplements: Are we doing it right? DTB Navarre 2012;20(3):1-12~~

**Formatted:** Spanish (International Sort), Superscript

**Formatted:** Spanish (International Sort)

**Formatted:** Font: 9 pt, Spanish (International Sort)

**Formatted:** Font: 9 pt

**Formatted:** Superscript

**Formatted:** Font: 9 pt, Not Bold, Not Italic

Table 1. Characteristics of cases and controls

|                                           | Cases      | Controls   | P-value* |
|-------------------------------------------|------------|------------|----------|
| N                                         | 2009       | 10045      |          |
| Age, years                                | 82.4 (6.6) | 82.4 (6.6) | 1.00     |
| Smoking                                   |            |            | 0.001    |
| Non-current smoker, %                     | 69.5       | 73.4       |          |
| Current smoker, %                         | 2.7        | 2.0        |          |
| Not recorded, %                           | 27.8       | 24.6       |          |
| Alcoholism, %                             | 0.4        | 0.2        | 0.30     |
| Body mass index, kg/m <sup>2</sup>        | 27.2 (5.0) | 29.0 (5.0) | <0.0001  |
| <20 kg/m <sup>2</sup> , %                 | 2.7        | 1.0        | <0.0001  |
| 20-<25 kg/m <sup>2</sup> , %              | 17.6       | 12.2       |          |
| 25-<30 kg/m <sup>2</sup> , %              | 25.5       | 28.9       |          |
| ≥30 kg/m <sup>2</sup> , %                 | 19.8       | 30.8       |          |
| Not recorded, %                           | 34.4       | 27.1       |          |
|                                           |            |            |          |
| <b>Comorbidities</b>                      |            |            |          |
| Previous fracture, %                      | 17.2       | 10.1       | <0.0001  |
| Kidney disease, %                         | 4.9        | 3.6        | 0.006    |
| Malabsorption, %                          | 2.3        | 2.1        | 0.54     |
| Stroke, %                                 | 10.7       | 6.2        | <0.0001  |
| Dementia, %                               | 14.6       | 6.2        | <0.0001  |
| Rheumatoid arthritis, %                   | 2.3        | 1.3        | 0.0006   |
| Diabetes, %                               | 22.2       | 17.7       | <0.0001  |
| Epilepsy, %                               | 1.4        | 0.9        | 0.03     |
| Parkinson disease, %                      | 4.9        | 1.9        | <0.0001  |
| Thyroid disease, %                        | 10.2       | 10.8       | 0.47     |
|                                           |            |            |          |
| <b>Use of medication</b>                  |            |            |          |
| PPI or H <sub>2</sub> receptor blocker, % | 38.2       | 34.0       | 0.0004   |
| Anxiolytic, %                             | 29.1       | 24.8       | <0.0001  |
| Antidepressants, %                        | 22.6       | 13.8       | <0.0001  |
| Antihypertensives, %                      | 56.8       | 61.6       | <0.0001  |
| Corticosteroids, %                        | 8.0        | 7.4        | 0.33     |
| Sedatives, %                              | 11.8       | 9.3        | 0.0006   |
| Raloxifene, %                             | 0.3        | 0.5        | 0.14     |
| Hormone replacement therapy, %            | 0.0        | 0.0        | 1.00     |
| Thiazolidinedione, %                      | 0.3        | 0.2        | 0.43     |

1  
2  
3  
4  
5  
6  
7  
8  
9  
10  
11  
12  
13  
14  
15  
16  
17  
18  
19  
20  
21  
22  
23  
24  
25  
26  
27  
28  
29  
30  
31  
32  
33  
34  
35  
36  
37  
38  
39  
40  
41  
42  
43  
44  
45  
46  
47  
48  
49  
50  
51  
52  
53  
54  
55  
56  
57  
58  
59  
60

Values correspond to percentage or means (standard deviation). P-values calculated from chi-square test for categorical values and Student's t test for continuous variables.

For peer review only

Table 2. Association of any bisphosphonate use with the risk of hip fracture.

|                                | Cases       | Controls    | Average cumulative duration (days) | Time since first BP prescription (days) | Model 1          | Model 2          |
|--------------------------------|-------------|-------------|------------------------------------|-----------------------------------------|------------------|------------------|
|                                | n (%)       | n (%)       | Mean (SD)                          | Mean (SD)                               | OR (95% CI)      | OR (95% CI)      |
| <b>Use</b>                     |             |             |                                    |                                         |                  |                  |
| No use                         | 1726 (85.9) | 8838 (88.0) | -                                  | -                                       | 1 (ref.)         | 1 (ref.)         |
| Ever use                       | 283 (14.1)  | 1207 (12.0) | 600 (556)                          | 968 (622)                               | 1.21 (1.05-1.39) | 1.09 (0.94-1.27) |
| <b>Timing</b>                  |             |             |                                    |                                         |                  |                  |
| No use                         | 1726 (85.9) | 8838 (88.0) | -                                  | -                                       | 1 (ref.)         | 1 (ref.)         |
| Past use                       | 111 (5.5)   | 347 (3.5)   | 315(415)                           | 1164 (601)                              | 1.63 (1.31-2.04) | 1.50 (1.19-1.89) |
| Recent use                     | 43 (2.1)    | 127 (1.3)   | 515(521)                           | 774 (599)                               | 1.74 (1.22-2.47) | 1.34 (0.92-1.95) |
| Current use                    | 129 (6.4)   | 733 (7.3)   | 769(563)                           | 903 (612)                               | 0.90 (0.74-1.10) | 0.84 (0.68-1.03) |
| p for trend                    |             |             |                                    |                                         | 0.54             | 0.53             |
| <b>Duration</b>                |             |             |                                    |                                         |                  |                  |
| No use (≤30 d)                 | 1726 (85.9) | 8838 (88.0) | -                                  | -                                       | 1 (ref.)         | 1 (ref.)         |
| >30 d ≤1 yr                    | 139 (6.9)   | 533 (5.3)   | 147 (106)                          | 687 (590)                               | 1.34 (1.10-1.63) | 1.20 (0.97-1.47) |
| >1 yr - ≤3 yr                  | 92 (4.6)    | 458 (4.6)   | 684 (211)                          | 956 (419)                               | 1.03 (0.82-1.30) | 0.94 (0.74-1.20) |
| >3 yr                          | 52 (2.6)    | 216 (2.2)   | 1566 (375)                         | 1698 (437)                              | 1.25 (0.91-1.70) | 1.15 (0.82-1.60) |
| p for trend                    |             |             |                                    |                                         | 0.16*            | 0.63*            |
| <b>Time since first BP use</b> |             |             |                                    |                                         |                  |                  |
| No use (≤30 d)                 | 1726 (85.9) | 8838 (88.0) | -                                  | -                                       | 1 (ref.)         | 1 (ref.)         |
| >30 d ≤1 yr                    | 41 (2.0)    | 222 (2.2)   | 140 (99)                           | 194 (103)                               | 0.95 (0.67-1.33) | 0.85 (0.60-1.21) |
| >1 yr - ≤3 yr                  | 120 (6.0)   | 546 (5.4)   | 454 (299)                          | 727 (209)                               | 1.13 (0.92-1.38) | 1.02 (0.82-1.26) |
| >3 yr                          | 122 (6.1)   | 439 (4.4)   | 990 (660)                          | 1618 (445)                              | 1.44 (1.17-1.78) | 1.32 (1.05-1.65) |
| p for trend**                  |             |             |                                    |                                         | 0.0008           | 0.03             |

Model 1: Conditional logistic regression model; Model 2: Conditional logistic regression model adjusted for smoking, BMI, alcoholism, previous fracture, kidney disease, malabsorption, stroke, dementia, rheumatoid arthritis, diabetes, epilepsy, Parkinson disease, and thyroid disease, PPI (no use, ≤1 yr, >1 yr), anxiolytics, sedatives, antidepressants, antihypertensives, oral corticosteroids (no use, ≤1 yr, >1 yr), raloxifene, hormone replacement therapy, and thiazolidinediones

\* Modeled as the median duration of use in each category; \*\* Modeled as time in days since first bisphosphonate prescription (0 for no users)

1  
2  
3  
4  
5  
6  
7  
8  
9  
10  
11  
12  
13  
14  
15  
16  
17  
18  
19  
20  
21  
22  
23  
24  
25  
26  
27  
28  
29  
30  
31  
32  
33  
34  
35  
36  
37  
38  
39  
40  
41  
42  
43  
44  
45  
46  
47  
48  
49

**Table 3. Risk of hip fracture by time since first prescription for bisphosphonates**

|                         | Cases      | Controls   | Average cumulative duration (days) | Time since first BP prescription (days) | Model 1          | Model 2          |
|-------------------------|------------|------------|------------------------------------|-----------------------------------------|------------------|------------------|
|                         | n (%)      | n (%)      | Mean (SD)                          | Mean (SD)                               | OR (95% CI)      | OR (95% CI)      |
| Time since first BP use |            |            |                                    |                                         |                  |                  |
| >30 d ≤1 yr             | 41 (14.5)  | 222 (18.4) | 157 (133)                          | 194 (103)                               | 1 (ref)          | 1 (ref)          |
| >1 yr - ≤3 yr           | 120 (42.4) | 546 (45.2) | 535 (451)                          | 727 (209)                               | 1.23 (0.68-2.23) | 1.49 (0.71-3.13) |
| >3 yr                   | 122 (43.1) | 439 (36.4) | 1138 (873)                         | 1618 (445)                              | 1.79 (0.94-3.40) | 2.21 (0.96-5.09) |
| p for trend*            |            |            |                                    |                                         | 0.03             | 0.03             |

Model 1: Conditional logistic regression model

Model 2: Conditional logistic regression model adjusted for smoking, BMI, alcoholism, previous fracture, kidney disease, malabsorption, stroke, dementia, rheumatoid arthritis, diabetes, epilepsy, Parkinson disease, and thyroid disease, PPI (no use, <=1 yr, >1 yr), anxiolytics, sedatives, antidepressants, antihypertensives, oral corticosteroids (no use, <=1 yr, >1 yr), raloxifene, hormone replacement therapy, and thiazolidinediones

\* Modeled as time in days since first bisphosphonate prescription



**Table 4. Association of ever use of individual bisphosphonates with the risk of hip fracture.**

|             | Cases       | Controls    | Average duration | Time since first prescription | Model 1          | Model 2          |
|-------------|-------------|-------------|------------------|-------------------------------|------------------|------------------|
|             | n (%)       | n (%)       | (days)           | (days)                        | OR (95% CI)      | OR (95% CI)      |
| Never use   | 1726 (85.9) | 8838 (88.0) | -                | -                             | 1 (ref.)         | 1 (ref.)         |
| Alendronate | 128 (6.4)   | 598 (6.0)   | 599 (566)        | 956 (603)                     | 1.10 (0.90-1.34) | 0.99 (0.81-1.22) |
| Risedronate | 95 (4.7)    | 438 (4.4)   | 508 (459)        | 822 (503)                     | 1.12 (0.89-1.41) | 1.02 (0.81-1.30) |
| Etidronate  | 19 (1.0)    | 63 (0.6)    | 818 (629)        | 1478 (746)                    | 1.55 (0.92-2.59) | 1.56 (0.91-2.65) |
| Ibandronate | 7 (0.4)     | 9 (0.1)     | 161 (137)        | 239 (151)                     | 4.18 (1.55-11.2) | 3.67 (1.31-10.3) |
| Switcher    | 34 (1.7)    | 99 (1.0)    | 898 (676)        | 1397 (714)                    | 1.80 (1.21-2.68) | 1.63 (1.07-2.47) |

Model 1: Conditional logistic regression model

Model 2: Conditional logistic regression model adjusted for smoking, BMI, and alcoholism, previous fracture, kidney disease, malabsorption, stroke, dementia, rheumatoid arthritis, diabetes, epilepsy, Parkinson disease, and thyroid disease, PPI (no use, <=1 yr, >1 yr), anxiolytics, sedatives, antidepressants, antihypertensives, oral corticosteroids (no use, <=1 yr, >1 yr), raloxifene, hormone replacement therapy, and thiazolidinediones

1  
2  
3  
4  
5  
6  
7  
8  
9  
10  
11  
12  
13  
14  
15  
16  
17  
18  
19  
20  
21  
22  
23  
24  
25  
26  
27  
28  
29  
30  
31  
32  
33  
34  
35  
36  
37  
38  
39  
40  
41  
42  
43  
44  
45  
46  
47  
48  
49  
50  
51  
52  
53  
54  
55  
56  
57  
58  
59  
60

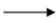

Figure 1. Selection of study population

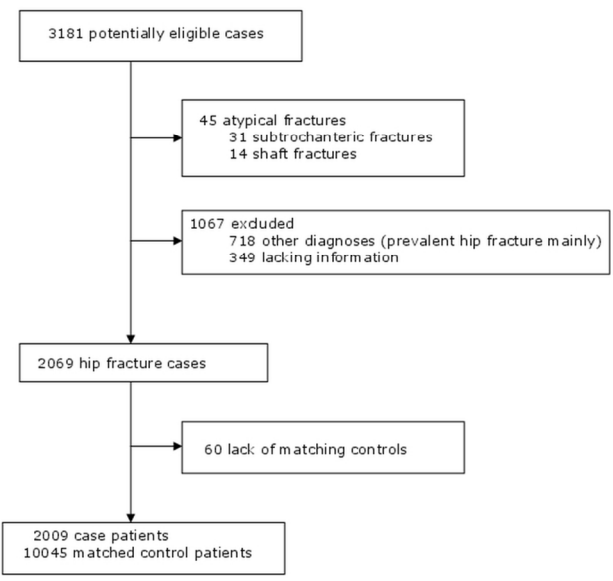

90x127mm (300 x 300 DPI)

**STROBE 2007 (v4) checklist of items to be included in reports of observational studies in epidemiology\***  
**Checklist for cohort, case-control, and cross-sectional studies (combined)**

| Section/Topic             | Item # | Recommendation                                                                                                                                                                                                                                                                                                                                                                                                                                                                   | Reported on page # |
|---------------------------|--------|----------------------------------------------------------------------------------------------------------------------------------------------------------------------------------------------------------------------------------------------------------------------------------------------------------------------------------------------------------------------------------------------------------------------------------------------------------------------------------|--------------------|
| Title and abstract        | 1      | (a) Indicate the study's design with a commonly used term in the title or the abstract. <b>OK</b>                                                                                                                                                                                                                                                                                                                                                                                |                    |
|                           |        | (b) Provide in the abstract an informative and balanced summary of what was done and what was found <b>OK</b>                                                                                                                                                                                                                                                                                                                                                                    |                    |
| <b>Introduction</b>       |        |                                                                                                                                                                                                                                                                                                                                                                                                                                                                                  |                    |
| Background/rationale      | 2      | Explain the scientific background and rationale for the investigation being reported <b>OK</b>                                                                                                                                                                                                                                                                                                                                                                                   |                    |
| Objectives                | 3      | State specific objectives, including any pre-specified hypotheses <b>OK</b>                                                                                                                                                                                                                                                                                                                                                                                                      |                    |
| <b>Methods</b>            |        |                                                                                                                                                                                                                                                                                                                                                                                                                                                                                  |                    |
| Study design              | 4      | Present key elements of study design early in the paper <b>OK</b>                                                                                                                                                                                                                                                                                                                                                                                                                |                    |
| Setting                   | 5      | Describe the setting, locations, and relevant dates, including periods of recruitment, exposure, follow-up, and data collection <b>OK</b>                                                                                                                                                                                                                                                                                                                                        |                    |
| Participants              | 6      | (a) <i>Cohort study</i> —Give the eligibility criteria, and the sources and methods of selection of participants. Describe methods of follow-up<br><i>Case-control study</i> —Give the eligibility criteria, and the sources and methods of case ascertainment and control selection. Give the rationale for the choice of cases and controls <b>OK</b><br><i>Cross-sectional study</i> —Give the eligibility criteria, and the sources and methods of selection of participants |                    |
|                           |        | (b) <i>Cohort study</i> —For matched studies, give matching criteria and number of exposed and unexposed<br><i>Case-control study</i> —For matched studies, give matching criteria and the number of controls per case <b>OK</b>                                                                                                                                                                                                                                                 |                    |
| Variables                 | 7      | Clearly define all outcomes, exposures, predictors, potential confounders, and effect modifiers. Give diagnostic criteria, if applicable <b>OK</b>                                                                                                                                                                                                                                                                                                                               |                    |
| Data sources/ measurement | 8*     | For each variable of interest, give sources of data and details of methods of assessment (measurement). Describe comparability of assessment methods if there is more than one group <b>OK</b>                                                                                                                                                                                                                                                                                   |                    |
| Bias                      | 9      | Describe any efforts to address potential sources of bias <b>OK</b>                                                                                                                                                                                                                                                                                                                                                                                                              |                    |
| Study size                | 10     | Explain how the study size was arrived at <b>OK</b>                                                                                                                                                                                                                                                                                                                                                                                                                              |                    |
| Quantitative variables    | 11     | Explain how quantitative variables were handled in the analyses. If applicable, describe which groupings were chosen and why <b>OK</b>                                                                                                                                                                                                                                                                                                                                           |                    |
| Statistical methods       | 12     | (a) Describe all statistical methods, including those used to control for confounding <b>OK</b>                                                                                                                                                                                                                                                                                                                                                                                  |                    |
|                           |        | (b) Describe any methods used to examine subgroups and interactions <b>OK</b>                                                                                                                                                                                                                                                                                                                                                                                                    |                    |
|                           |        | (c) Explain how missing data were addressed <b>OK</b>                                                                                                                                                                                                                                                                                                                                                                                                                            |                    |
|                           |        | (d) <i>Cohort study</i> —If applicable, explain how loss to follow-up was addressed<br><i>Case-control study</i> —If applicable, explain how matching of cases and controls was addressed <b>OK</b>                                                                                                                                                                                                                                                                              |                    |

|                          |     |                                                                                                                                                                                                                        |  |
|--------------------------|-----|------------------------------------------------------------------------------------------------------------------------------------------------------------------------------------------------------------------------|--|
|                          |     | <i>Cross-sectional study</i> —If applicable, describe analytical methods taking account of sampling strategy                                                                                                           |  |
|                          |     | (e) Describe any sensitivity analyses                                                                                                                                                                                  |  |
| <b>Results</b>           |     |                                                                                                                                                                                                                        |  |
| Participants             | 13* | (a) Report numbers of individuals at each stage of study—eg numbers potentially eligible, examined for eligibility, confirmed eligible, included in the study, completing follow-up, and analysed <b>OK</b>            |  |
|                          |     | (b) Give reasons for non-participation at each stage <b>Not applicable</b>                                                                                                                                             |  |
|                          |     | (c) Consider use of a flow diagram <b>Not applicable</b>                                                                                                                                                               |  |
| Descriptive data         | 14* | (a) Give characteristics of study participants (eg demographic, clinical, social) and information on exposures and potential confounders <b>OK</b>                                                                     |  |
|                          |     | (b) Indicate number of participants with missing data for each variable of interest <b>OK</b>                                                                                                                          |  |
|                          |     | (c) <i>Cohort study</i> —Summarise follow-up time (eg, average and total amount)                                                                                                                                       |  |
| Outcome data             | 15* | <i>Cohort study</i> —Report numbers of outcome events or summary measures over time                                                                                                                                    |  |
|                          |     | <i>Case-control study</i> —Report numbers in each exposure category, or summary measures of exposure <b>OK</b>                                                                                                         |  |
|                          |     | <i>Cross-sectional study</i> —Report numbers of outcome events or summary measures                                                                                                                                     |  |
| Main results             | 16  | (a) Give unadjusted estimates and, if applicable, confounder-adjusted estimates and their precision (eg, 95% confidence interval). Make clear which confounders were adjusted for and why they were included <b>OK</b> |  |
|                          |     | (b) Report category boundaries when continuous variables were categorized <b>OK</b>                                                                                                                                    |  |
|                          |     | (c) If relevant, consider translating estimates of relative risk into absolute risk for a meaningful time period                                                                                                       |  |
| Other analyses           | 17  | Report other analyses done—eg analyses of subgroups and interactions, and sensitivity analyses <b>OK</b>                                                                                                               |  |
| <b>Discussion</b>        |     |                                                                                                                                                                                                                        |  |
| Key results              | 18  | Summarise key results with reference to study objectives <b>OK</b>                                                                                                                                                     |  |
| Limitations              | 19  | Discuss limitations of the study, taking into account sources of potential bias or imprecision. Discuss both direction and magnitude of any potential bias <b>OK</b>                                                   |  |
| Interpretation           | 20  | Give a cautious overall interpretation of results considering objectives, limitations, multiplicity of analyses, results from similar studies, and other relevant evidence <b>OK</b>                                   |  |
| Generalisability         | 21  | Discuss the generalisability (external validity) of the study results <b>OK</b>                                                                                                                                        |  |
| <b>Other information</b> |     |                                                                                                                                                                                                                        |  |
| Funding                  | 22  | Give the source of funding and the role of the funders for the present study and, if applicable, for the original study on which the present article is based <b>OK</b>                                                |  |

\*Give information separately for cases and controls in case-control studies and, if applicable, for exposed and unexposed groups in cohort and cross-sectional studies.

**Note:** An Explanation and Elaboration article discusses each checklist item and gives methodological background and published examples of transparent reporting. The STROBE checklist is best used in conjunction with this article (freely available on the Web sites of PLoS Medicine at <http://www.plosmedicine.org/>, Annals of Internal Medicine at <http://www.annals.org/>, and Epidemiology at <http://www.epidem.com/>). Information on the STROBE Initiative is available at [www.strobe-statement.org](http://www.strobe-statement.org).
